# Supplementary material for: How Have Researchers Acknowledged and Controlled for Academic Work Activity When Measuring Medical Students’ Internet Addiction? A Systematic Literature Review
Source: MDPI journal article supplement (doi:10.3390/ijerph18147681), 2021-07-20
Supplement: s1 [file s1]

**Table S1: General Description of Studies**

| <b>Lead Author, Publication Date, Citation</b> | <b>Year of study</b> | <b>Sample country</b> | <b>Sample Size and Description</b>                                                                             | <b>Study method (if stated).</b>      | <b>Tools or methods used to measure addiction</b> |
|------------------------------------------------|----------------------|-----------------------|----------------------------------------------------------------------------------------------------------------|---------------------------------------|---------------------------------------------------|
| Ade, 2018 [24]                                 | n.d.                 | n.p.                  | N=100 undergraduate medical students (50 female and 50 male) in a “government medical college in a metro city” | Cross sectional, descriptive          | Young’s IAT (20 Question)                         |
| Agah, 2016 [25]                                | 2015                 | Iran                  | N=1,000 medical students from Sabzevar University                                                              | Cross sectional, descriptive          | Young’s IAT (20 Question)                         |
| Ahmed, 2019 [26]                               | 2018                 | Bangladesh            | N=350 medical students from private medical colleges in Dhaka City                                             | Cross sectional                       | Young’s IAT (20 Question)                         |
| Ahmer, 2018 [27]                               | 2016                 | Pakistan              | N=340 medical students from Jinnah Sindh Medical University & Liaquat College of Medicine and Dentistry        | Cross sectional                       | Young’s IAT (20 Question)                         |
| Alfadhul, 2018 [28]                            | 2017                 | Iraq                  | N=218 medical students of faculty of medicine, Kufa University                                                 | Systematic sampling; cross sectional  | Young’s IAT (20 Question)                         |
| Ali, 2019 [29]                                 | n.d.                 | Kashmir               | N=100 medical students in Mahi-ud-din Islamic Medical college Mirpur, Kashmir                                  | Convenience sampling; Cross-sectional | Young’s IAT (20 Question)                         |

| <b>Lead Author, Publication Date, Citation</b> | <b>Year of study</b> | <b>Sample country</b>   | <b>Sample Size and Description</b>                                                         | <b>Study method (if stated).</b>     | <b>Tools or methods used to measure addiction</b> |
|------------------------------------------------|----------------------|-------------------------|--------------------------------------------------------------------------------------------|--------------------------------------|---------------------------------------------------|
| Alpaslan, 2015 [30]                            | 2013                 | Turkey                  | N=328 medical students at Afyon Kocatepe University                                        | Cross-sectional                      | Young's IAT (20 Question?)                        |
| Al-qadasi, 2018 [8]                            | 2015/2016            | Yemen                   | N=275 medical students at University of Science and Technology, Sana'a                     | Cross sectional                      | Young's IAT (20 Question)                         |
| Anand, 2018 [31]                               | n.d.                 | India                   | N=1763 medical students from three south Indian cities of Bangalore, Mangalore and Trissur | Cross sectional                      | Young's IAT (20 Question)                         |
| Arya, 2018 [32]                                | 2017                 | India                   | N=402 MBBS students at medical college, Jhansi, Uttar Pradesh                              | Cross sectional                      | Young's IAT (20 Question)                         |
| Asokan, 2019 [33]                              | 2017/2018            | India                   | N=381 in "a medical college" in India                                                      | Cross sectional                      | Young's IAT (20 Question)                         |
| Bakarman, 2017 [34]                            | 2013/2014            | Saudi Arabia            | N=161 senior medical students at King Abdulaziz University                                 | Stratified sampling; cross sectional | Young's IAT (20 Question)                         |
| Balhara, 2015 [35]                             | n.d.                 | Croatia, India, Nigeria | N=842 Graduate medical students at three institutions                                      |                                      | Young's IAT (20 Question)                         |
| Bansode, 2019 [36]                             | 2018                 | India                   | N=83 1 <sup>st</sup> -year medical students, Mumbai                                        | Cross sectional                      | Young's IAT (20 Question)                         |
| Berner, 2014 [37]                              | 2012                 | Chile                   | N=384 1 <sup>st</sup> -5 <sup>th</sup> -year undergraduate medical students at a medical   |                                      | Young's IAT (20 Question)                         |

| Lead Author, Publication Date, Citation        | Year of study | Sample country | Sample Size and Description                                                                                             | Study method (if stated).                   | Tools or methods used to measure addiction |
|------------------------------------------------|---------------|----------------|-------------------------------------------------------------------------------------------------------------------------|---------------------------------------------|--------------------------------------------|
|                                                |               |                | school in Santiago de Chile                                                                                             |                                             |                                            |
| Boonvisudhi, 2017 [38]                         | 2015          | Thailand       | N=705 1 <sup>st</sup> -5 <sup>th</sup> -year medical students studying at the Faculty of Medicine, Ramathibodi Hospital | Cross-sectional, descriptive                | Young's IAT (8 Question)                   |
| Capetillo-Ventura, 2015 [39]                   | 2013          | n.p.           | N=522 medical students                                                                                                  |                                             | Young's IAT (20 Question)                  |
| Chakraborti, 2016 [40]                         | n.d.          | India          | N=98 medical undergraduates                                                                                             |                                             | Young's IAT (20 Question)                  |
| Chathoth, 2013 [41]<br><br>Chathoth, 2014 [42] | 2013          | India          | N=90 medical students                                                                                                   | Random sampling;<br>Cross-sectional         | Young's IAT (20 Question)                  |
| Chaudhari, 2015 [43]                           | n.d.          | India          | N=282 medical students                                                                                                  | Stratified sample;<br>cross-sectional study | Young's IAT (20 Question)                  |
| Chaudhuri, 2019 [44]                           | n.d.          | India          | N=201 undergraduate students in a tertiary medical college of West Bengal                                               | Cross-sectional                             | Young's IAT (20 Question)                  |
| Ching, 2017 [45]<br><br>Mooi, 2019 [46]        | 2013          | Malaysia       | N=426 medical students from Universiti Putra                                                                            | Cross-sectional                             | Young's IAT (20 Question) (Malay Version). |
| Damor, 2018 [47]                               | n.d.          | India          | N=313 medical students of                                                                                               | Cross-sectional                             | Young's IAT (20 Question)                  |

| <b>Lead Author,<br/>Publication Date,<br/>Citation</b> | <b>Year of<br/>study</b> | <b>Sample<br/>country</b> | <b>Sample Size and<br/>Description</b>                                                                                            | <b>Study method<br/>(if stated).</b>   | <b>Tools or methods used to<br/>measure addiction</b> |
|--------------------------------------------------------|--------------------------|---------------------------|-----------------------------------------------------------------------------------------------------------------------------------|----------------------------------------|-------------------------------------------------------|
|                                                        |                          |                           | Government Medical<br>College, Surat                                                                                              |                                        |                                                       |
| Daripelly, 2017<br>[48]                                | n.d.                     | India                     | N=150 undergraduate<br>students of final year<br>MBBS, SVS Medical<br>College,<br>Mahabubnagar                                    | Cross-sectional                        | Young's IAT (20 Question)                             |
| Duică, 2017 [49]                                       | n.d.                     | Romania                   | N=1276 students from<br>all Romanian medicine<br>universities                                                                     |                                        | Young's IAT (20 Question)                             |
| Fatehi, 2016 [50]                                      | 2013/2014                | Iran                      | N=174 4 <sup>th</sup> - 7 <sup>th</sup> -year<br>undergraduate medical<br>students at Tehran<br>University of Medical<br>Sciences | Cross-sectional                        | Young's IAT (20 Question)                             |
| Gaddala, 2017 [51]                                     | 2017                     | India                     | N=402 2 <sup>nd</sup> - 4 <sup>th</sup> year<br>medical students,<br>Chalmeda Anand Rao<br>Institute of Medical<br>Sciences       | Random<br>sample;<br>Cross sectional   | Young's IAT (20 Question)                             |
| Gedam, 2016 [52]                                       | 2015                     | India                     | N=249 <sup>a</sup> 3 <sup>rd</sup> & 4 <sup>th</sup> -year<br>medical students of<br>Jawaharlal Nehru<br>Medical College          | Cross-sectional                        | Young's IAT (20 Question)                             |
| Gedam, 2016 [53]                                       | 2015                     | India                     | N=390 medical<br>students from Wardha,<br>Maharashtra                                                                             | Random<br>sampling;<br>Cross-sectional | Young's IAT (20 Question)                             |

| <b>Lead Author, Publication Date, Citation</b> | <b>Year of study</b> | <b>Sample country</b> | <b>Sample Size and Description</b>                                                                    | <b>Study method (if stated).</b>                  | <b>Tools or methods used to measure addiction</b>                  |
|------------------------------------------------|----------------------|-----------------------|-------------------------------------------------------------------------------------------------------|---------------------------------------------------|--------------------------------------------------------------------|
| George, 2019 [9]                               | n.d.                 | India                 | N=199 <sup>b</sup> medical students “in a private medical college”                                    | Stratified, randomised; Cross-sectional           | Young’s IAT (20 Question)                                          |
| Ghamari, 2011 [54]                             | 2009                 | Iran                  | N=426 medical students of Arak University                                                             | Stratified proportional sampling; random sampling | “Yang” [Young’s IAT?] Persian language version.                    |
| Ghanate, 2019 [55]                             | 2018                 | India                 | N=700 medical students of Kalaburagi district of Karnataka                                            | Random sampling ; cross-sectional                 | Young’s IAT (20 Question)                                          |
| Ghosh, 2018 [56]                               | 2015                 | India                 | N= 155 1 <sup>st</sup> and 3 <sup>rd</sup> semester medical students of CMSDH, Kamarhati, West Bengal | Cross-sectional                                   | Young’s IAT (20 Question)                                          |
| Güzel, 2018 [57]                               | 2017/2018            | Turkey                | N=327 medical students of Trakya University School of Medicine                                        | Stratified, randomised sampling                   | Günüç Murat Kayri’s Internet Addiction Scale (Günüç & Kayrı, 2010) |
| Hajare, 2017 [58]                              | 2014/2015            | India                 | N=402 medical students at NKP Salve Institute of Medical Sciences & Research Centre, Nagpur           | Cross-sectional; Stratified random sampling       | Young’s IAT (no. of questions not given)                           |
| Hamissi, 2013 [59]                             | n.d.                 | n.p.                  | N=201 medical students                                                                                | Cross–sectional survey;                           | Young’s IAT (20 Question)                                          |

| Lead Author, Publication Date, Citation | Year of study | Sample country     | Sample Size and Description                                                                         | Study method (if stated).         | Tools or methods used to measure addiction                                                                                                                      |
|-----------------------------------------|---------------|--------------------|-----------------------------------------------------------------------------------------------------|-----------------------------------|-----------------------------------------------------------------------------------------------------------------------------------------------------------------|
|                                         |               |                    |                                                                                                     | random selection                  |                                                                                                                                                                 |
| Haque, 2016 [60]                        | 2014/2015     | Malaysia           | N=112 1 <sup>st</sup> -5 <sup>th</sup> year medical students of Universiti Sultan Zainal Abidin     | Random selection; cross-sectional | Internet Addiction Diagnostic Questionnaire ( <a href="http://netaddiction.com/internet-addiction-test/">http://netaddiction.com/internet-addiction-test/</a> ) |
| Hayat, 2020 [61]                        | n.d.          | Iran               | N=233 medical students of Shiraz University of Medical Sciences                                     | Cross-sectional correlational     | Young's IAT (20 Question)                                                                                                                                       |
| Hussain, 2018 [62]                      | 2015          | Pakistan           | N=120 medical students                                                                              | Random Sampling                   | Young's IAT (20 Question)                                                                                                                                       |
| Ja'ffar, 2019 [63]                      | 2017          | Iraq               | N=263 Al-Kindy Medical College Students in Baghdad                                                  | Cross sectional                   | Young's IAT (20 Question)                                                                                                                                       |
| Jain, 2018 [64]                         | 2017          | India              | N=150 undergraduate medical students of SS Medical College Rewa, MP                                 | Randomised; Cross sectional       | Young's IAT (20 Question)                                                                                                                                       |
| Javaeed, 2019 [65]                      | 2018          | Kashmir (Pakistan) | N=210 undergraduate medical students (first to the fifth year) Poonch Medical College, Azad Kashmir | Cross-sectional                   | Young's IAT (20 Question)                                                                                                                                       |
| Javaeed, 2020) [66]                     | 2018          | Kashmir (Pakistan) | N=316 medical students (second to fifth year) of Poonch Medical College, Azad Kashmir               | Cross-sectional                   | Young's IAT (20 Question)                                                                                                                                       |

| <b>Lead Author, Publication Date, Citation</b> | <b>Year of study</b> | <b>Sample country</b> | <b>Sample Size and Description</b>                                                | <b>Study method (if stated).</b>            | <b>Tools or methods used to measure addiction</b>        |
|------------------------------------------------|----------------------|-----------------------|-----------------------------------------------------------------------------------|---------------------------------------------|----------------------------------------------------------|
| Kannan, 2019 [67]                              | 2016                 | India                 | N=201 undergraduate medical students                                              | Cross-sectional                             | Young's IAT (20 Question)                                |
| Kapadia, 2015 [68]                             | 2015                 | India                 | N=200 medical students of B. J. Medical College, Ahmedabad                        | Random selection                            | Young's IAT (20 Question)                                |
| Khan, 2016 [69]<br>Khan, 2017 [70]             | 2015                 | Pakistan              | N=322 MBBS students at Army Medical College, Rawalpindi                           | Non-probability convenience sampling        | Young's IAT (20 Question)                                |
| Komleh, 2015 [71]                              | 2013                 | Iran                  | N=417 medical students of basic sciences of Tehran University of Medical Sciences | Stratified random sampling; cross-sectional | Young's IAT (no. of questions not given) [Farsi version] |
| Kootesh, 2016 [10]                             | n.d.                 | Iran                  | N= 250 Tehran University of medical sciences University students                  | Stratified Random sample                    | Young's IAT (20 Question)                                |
| Kumar, 2017 [72]                               | 2015                 | India                 | N=150 <sup>c</sup> medical students of SSIMS and RC Davangere                     | Random sampling; cross sectional study      | Young's IAT (20 Question)                                |
| Kundu, 2017 [73]                               | 2016/2017            | India                 | N=130 medical students of Gurugram                                                | Cross-sectional                             | Young's IAT (20 Question)                                |
| Latt, 2017 [74]                                | 2015                 | Malaysia              | N=103 first year medical students at                                              | Cross-sectional descriptive                 | Young's IAT (20 Question)                                |

| <b>Lead Author,<br/>Publication Date,<br/>Citation</b> | <b>Year of<br/>study</b> | <b>Sample<br/>country</b> | <b>Sample Size and<br/>Description</b>                                                                      | <b>Study method<br/>(if stated).</b>          | <b>Tools or methods used to<br/>measure addiction</b>                        |
|--------------------------------------------------------|--------------------------|---------------------------|-------------------------------------------------------------------------------------------------------------|-----------------------------------------------|------------------------------------------------------------------------------|
|                                                        |                          |                           | IIUM, Kuantan<br>Campus, Pahang                                                                             |                                               |                                                                              |
| Liu, 2009 [75]                                         | 2009                     | China                     | N=352 students from<br>three medical<br>academies in Xi'an                                                  | Randomly<br>stratified<br>cluster<br>sampling | Author's own "Questionnaire on<br>University Students' Internet<br>Behavior" |
| Loredo e Silva,<br>2018 [76]                           | 2015/2016                | Brazil                    | N=710 students from<br>Federal University of<br>Juiz de Fora                                                | Cross-sectional                               | Young's IAT (20 Question)                                                    |
| Madhusudan, 2018<br>[77]                               | 2018                     | India                     | N=729 medical<br>students at DM<br>Wayanad Institute of<br>Medical Sciences,<br>Wayanad District,<br>Kerala | Cross-sectional                               | Young's IAT (20 Question)                                                    |
| Mallya, 2019 [78]                                      | 2018                     | n.p.                      | N=200 1 <sup>st</sup> & 2 <sup>nd</sup> -year<br>medical students at a<br>private medical college           | Cross-sectional                               | Chen's Internet Addiction Scale<br>(CIAS)                                    |
| Malviya, 2014 [79]                                     | 2012                     | India                     | N=242 undergraduates<br>of MGM Medical<br>College of Indore City                                            | Random<br>sampling;<br>cross sectional        | Young's IAT (20 Question)                                                    |
| Mohammadbeigi,<br>2016 [80]                            | 2014                     | Iran                      | N=254 students in<br>Qom Medical<br>University, second<br>term or higher                                    | Cross sectional                               | Young's IAT (20 Question)                                                    |
| Mostafa, 2019 [81]                                     | 2017/2018                | Bangladesh                | N=254 <sup>a</sup> medical<br>students from<br>Chattagram Maa-O-<br>Shishu Hospital                         | Cross-sectional                               | Young's IAT (20 Question)                                                    |



| <b>Lead Author, Publication Date, Citation</b> | <b>Year of study</b> | <b>Sample country</b> | <b>Sample Size and Description</b>                                      | <b>Study method (if stated).</b> | <b>Tools or methods used to measure addiction</b>    |
|------------------------------------------------|----------------------|-----------------------|-------------------------------------------------------------------------|----------------------------------|------------------------------------------------------|
|                                                |                      |                       | Medical College (CMOSHMC)                                               |                                  |                                                      |
| Mukherjee, 2020 [82]                           | 2015                 | India                 | N=150 medical students, aged 17-25, in R.G Kar Medical College, Kolkata | Cross-sectional                  | Young's IAT (20 Question)                            |
| Nagori, 2016 [83]                              | 2014/2015            | India                 | N=525 Medical students [from Government Medical College, Bhavnagar?]    | Observational, cross-sectional   | Young's IAT (20 Question)                            |
| Nath, 2016 [84]                                | 2015                 | India                 | N=188 medical students from Silchar Medical College and Hospital        | Cross-sectional                  | Young's IAT (20 Question)                            |
| Öztürk Kaygusuz, 2019 [85]                     | 2018                 | Turkey                | N=407 Medical Faculty students of Fırat University                      | Cross-sectional                  | Modified Young's IAT (20 Question) [Turkish version] |
| Patel, 2018 [86]                               | 2018                 | India                 | N=139 2 <sup>nd</sup> -year MBBS students                               | Cross-sectional                  | Young's IAT (20 Question)                            |
| Patil, 2017 [87]                               | 2016                 | India                 | N=488 medical students in Nagpur                                        | Cross-sectional                  | Young's IAT (20 Question)                            |
| Pramanik, 2012 [88]                            | 2012                 | Nepal                 | N=130 medical students                                                  | Random sampling; cross-sectional | Young's IAT (20 Question)                            |
| Qadir, 2018 [89]                               | 2018                 | n.p.                  | N=100 medical students from Gomal Medical College                       | Cross-sectional                  | Young's IAT (20 Question)                            |
| Radeef, 2018 [90]                              | n.d.                 | Malaysia              | N=268 medical students from                                             | Prospective, cross-sectional     | Chen Internet addiction Scale (Malay version)        |

| <b>Lead Author,<br/>Publication Date,<br/>Citation</b> | <b>Year of<br/>study</b> | <b>Sample<br/>country</b> | <b>Sample Size and<br/>Description</b>                                                                           | <b>Study method<br/>(if stated).</b> | <b>Tools or methods used to<br/>measure addiction</b>                                          |
|--------------------------------------------------------|--------------------------|---------------------------|------------------------------------------------------------------------------------------------------------------|--------------------------------------|------------------------------------------------------------------------------------------------|
|                                                        |                          |                           | International Islamic<br>University Malaysia,<br>Kuantan campus                                                  |                                      |                                                                                                |
| Rebello, 2017 [91]                                     | 2016                     | India                     | N=129 1 <sup>st</sup> -year medical<br>students Karwar<br>Institute of Medical<br>Sciences, Karwar,<br>Karnataka | Cross-sectional                      | Compulsive internet usage scale<br>(Meerkerk, Van Den Eijnden,<br>Vermulst, & Garretsen, 2009) |
| Rustam, 2017 [92]                                      | 2016                     | Pakistan                  | N=200 medical<br>students from Rehman<br>Medical College,<br>Peshawar                                            | Cross-sectional                      | Young's IAT (20 Question)                                                                      |
| Sahraian, 2016 [93]                                    | 2014/2015 <sup>d</sup>   | Iran                      | N=278 medical<br>students                                                                                        | Cross-sectional                      | Young's IAT (20 Question)                                                                      |
| Saied, 2016) [94]                                      | 2015                     | Egypt                     | N=2,200 Malaysian<br>and Egyptian medical<br>students in Tanta<br>faculty of medicine,<br>Tanta University       | Cross-sectional                      | Young's IAT (20 Question)                                                                      |
| Saini, 2016 [95]                                       | 2015                     | India                     | N=140 medical<br>students from the<br>medical college of<br>Bikaner                                              | Cross-sectional                      | Young's IAT (20 Question)                                                                      |
| Salehi, 2014 [96]                                      | 2013                     | Iran                      | N=383 medical<br>students from Mashad,<br>Iran                                                                   | Cross sectional                      | Chen Internet addiction Scale<br>(Farsi version)                                               |
| Salek Ebrahimi,<br>2019 [97]                           | 2018                     | Iran                      | N=96 medical students<br>of Shahid Beheshti                                                                      | Random<br>sampling,                  | Young's IAT (20 Question)                                                                      |

| Lead Author, Publication Date, Citation | Year of study | Sample country | Sample Size and Description                                                                                        | Study method (if stated).               | Tools or methods used to measure addiction   |
|-----------------------------------------|---------------|----------------|--------------------------------------------------------------------------------------------------------------------|-----------------------------------------|----------------------------------------------|
|                                         |               |                | University of Medical Sciences                                                                                     | cross-sectional                         |                                              |
| Samaha, 2019 [98]<br>Samaha, 2018 [99]  | 2017          | Lebanon        | N=596 medical students in “various medical schools in Beirut”                                                      | Correlational, cross-sectional          | Young’s IAT (20 Question)                    |
| Şenol, 2019 [100]                       | n.d.          | Turkey         | N=168 1 <sup>st</sup> -3 <sup>rd</sup> year medical students from Suleyman Demirel University                      |                                         | (Günüç & Kayrı, 2010)                        |
| Shadzi, 2020 [101]                      | 2018          | Iran           | N=402 1 <sup>st</sup> -7 <sup>th</sup> year medical students of Shiraz University of Medical Sciences              | Stratified, randomised, cross-sectional | Young’s IAT (20 Question) [Persian Version]  |
| Shi, 2019 [102]                         | 2017          | China          | N=1,264 medical students from China Medical University, Guizhou Medical University, and Xiangya School of Medicine | Cross-sectional                         | Young’s IAT (20 Question)                    |
| Shinde, 2018 [103]                      | 2017/2018     | India?         | N=90 students of 1 <sup>st</sup> -3 <sup>rd</sup> year “in government medical college”                             | Randomised, cross sectional             | Young’s IAT (20 Question)                    |
| Shoghli, 2018) [6]                      | 2018          | Iran           | N= 137 internship students Zanjan University of Medical Sciences                                                   | Cross-sectional                         | Young’s IAT [20 Question?] [Persian version] |

| <b>Lead Author, Publication Date, Citation</b> | <b>Year of study</b> | <b>Sample country</b> | <b>Sample Size and Description</b>                                                          | <b>Study method (if stated).</b>        | <b>Tools or methods used to measure addiction</b> |
|------------------------------------------------|----------------------|-----------------------|---------------------------------------------------------------------------------------------|-----------------------------------------|---------------------------------------------------|
| Simcharoen, 2018 [104]                         | 2015                 | Thailand              | N= 324 1 <sup>st</sup> -6 <sup>th</sup> -year medical students of Chiang Mai University     |                                         | Young's IAT (20 Question)                         |
| Singh, 2018 [105]                              | n.d.                 | India                 | N=149 undergraduate students at Sikkim Manipal Medical College                              |                                         | Young's IAT (20 Question)                         |
| Singh, 2018 [106]                              | 2017                 | India                 | N=122 medical undergraduates in “a medical college in Northern India”                       | Cross-sectional                         | Young's IAT (20 Question)                         |
| Siraj, 2015 [107]                              | 2011/2012            | Malaysia              | N=176 <sup>e</sup> 4 <sup>th</sup> -year medical students at Malaysian Public University    | Cross-sectional                         | Young's IAT (8 Question)                          |
| Srijampana, 2014 [108]                         | 2013                 | India                 | N=211 medical students from two medical colleges in Guntur, Andhra Pradesh                  | Cross-sectional                         | Young's IAT (20 Question)                         |
| Subhaprada, 2017 [109]                         | 2016                 | India                 | N=95 undergraduate students of II MBBS, in Kurnool Medical College, Kurnool, Andhra Pradesh | Simple random sampling; cross-sectional | Young's IAT (20 Question)                         |
| Suresh, 2018 [110]                             | n.d.                 | India                 | N=150 1 <sup>st</sup> -year medical students of Akash Institute of Medical                  | Cross-sectional                         | Young's IAT (20 Question)                         |

| Lead Author, Publication Date, Citation | Year of study | Sample country | Sample Size and Description                                                                          | Study method (if stated).           | Tools or methods used to measure addiction            |
|-----------------------------------------|---------------|----------------|------------------------------------------------------------------------------------------------------|-------------------------------------|-------------------------------------------------------|
|                                         |               |                | Sciences and Research Centre, Bangalore                                                              |                                     |                                                       |
| Sushma, 2018 [111]                      | 2015          | India          | N= 236 undergraduate medical students in Mysore Medical College and Research Institute, Mysuru       | Cross-sectional                     | Young's IAT (20 Question)                             |
| Taha, 2019 [11]                         | 2017/2018     | Saudi Arabia   | N=209 <sup>f</sup> 1 <sup>st</sup> -3 <sup>rd</sup> year medical students in Qassim University       | Cross-sectional                     | [Young's?] IAT [own Arabic translation] (20 Question) |
| Tan, 2019 [7]                           | n.d.          | Malaysia       | N=207 medical students in Universiti Putra Malaysia                                                  | Cross-sectional                     | Young's IAT (8 Question)                              |
| Tsimtsiou, 2014 [112]                   | 2012          | Greece         | N=140 undergraduate and postgraduate medical students                                                |                                     | Young's IAT (20 Question) [Greek version]             |
| Tsimtsiou, 2015 [113]                   | 2013          | Greece         | N=585 medical students at the Aristotle University of Thessaloniki School of Medicine                |                                     | Young's IAT (20 Question) [Greek version]             |
| Upadhayay, 2017 [114]                   | n.d.          | Nepal          | N=100 1 <sup>st</sup> and 2 <sup>nd</sup> year medical students at Gandaki Medical College, Lekhnath | Convenience sample; cross-sectional | Young's IAT (20 Question)                             |
| V, 2017 [115]                           | 2015/2016     | India          | N=350 medical students from Mamata Medical College, Khammam                                          | Random sampling; cross-sectional    | Young's IAT (20 Question)                             |

| <b>Lead Author, Publication Date, Citation</b> | <b>Year of study</b> | <b>Sample country</b> | <b>Sample Size and Description</b>                                   | <b>Study method (if stated).</b> | <b>Tools or methods used to measure addiction</b> |
|------------------------------------------------|----------------------|-----------------------|----------------------------------------------------------------------|----------------------------------|---------------------------------------------------|
| Vidyachathoth, 2013 [116]                      | n.d.                 | India                 | N=90 medical students from Mangalore.                                | Randomised, cross-sectional      | Young's IAT (20 Question)                         |
| Wang, 2020 [117]                               | 2018                 | China                 | N=3,738 medical students from Wannan Medical College, China          | Stratified per year, randomised  | Young's IAT (20 Question)                         |
| Yerpude, 2019 [118]                            | 2016                 | India                 | N=312 final year MBBS students of a private medical college in Gurat | Cross-sectional                  | [Young's?] IAT (20 Question)                      |
| Yücens, 2018 [119]                             | 2017/2018            | Turkey                | N=392 undergraduate medical students at Afyon Kocatepe University    | Cross-sectional                  | Young's IAT (20 Question)                         |

<sup>a</sup> Part of a larger study.

<sup>b</sup> Not given in the paper, but estimated based upon percentages.

<sup>c</sup> Abstract says 138, but paper shows 150.

<sup>d</sup> Dates given as 1393-1394 (Persian Calendar)

<sup>e</sup> Abstract says 186, but data reflects only 176.

<sup>f</sup> N given as 216, but only 209 completed the survey.

**Table S2: Detailed Results**

| <b>Lead Author, Publication Date, Citation</b> | <b>Validity of IA question ed?</b> | <b>Measur ed against (e.g. Depression</b> | <b>Age &amp; Gender</b>                            | <b>Addiction rates (Prevalence)</b>                            | <b>Mentioned value of Internet for Academic work</b>                                           | <b>Results</b>                                                                                                                                                                                                                                                                                                                    |
|------------------------------------------------|------------------------------------|-------------------------------------------|----------------------------------------------------|----------------------------------------------------------------|------------------------------------------------------------------------------------------------|-----------------------------------------------------------------------------------------------------------------------------------------------------------------------------------------------------------------------------------------------------------------------------------------------------------------------------------|
| Ade, 2018 [24]                                 | No                                 | None                                      |                                                    | None: 11%<br>Mild: 63%<br>Moderate: 20%<br>Severe: 6%          | Yes.<br>Acknowledged in Introduction only, then no further discussion.                         | No usage or correlations studied.                                                                                                                                                                                                                                                                                                 |
| Agah, 2016 [25]                                | No                                 | None                                      | Mean age: 21.1±3.5                                 | None: 36%<br>Mild: 51.1%<br>Moderate: 12.3%<br>Severe: 0.6%    | Yes.<br>Acknowledged in Introduction; single mention in Discussion, but not taken into account | IA correlated with: <ul style="list-style-type: none"> <li>• gender (M&gt;F)</li> <li>• marital status</li> <li>• indigenous status.</li> </ul>                                                                                                                                                                                   |
| Ahmed, 2019 [26]                               | No                                 | None                                      | Mean age: 21.1±1.5<br>Female: 73.7%<br>Male: 26.3% | None: 23.1%<br>Mild: 17.8%<br>Moderate: 48.1%<br>Severe: 11.0% | Acknowledged in Introduction.<br><br>Mentioned in Discussion, but not taken into account.      | Internet used for: <ul style="list-style-type: none"> <li>• entertainment: 43.7%</li> <li>• time passing: 40%</li> <li>• social networking: 9.7%</li> <li>• <i>academic</i>: 6.6 %</li> </ul><br>IA correlated with: <ul style="list-style-type: none"> <li>• academic problems</li> <li>• time spent on the Internet.</li> </ul> |
| Ahmer, 2018 [27]                               | No                                 | None                                      | Age: 21.20 ±1.67                                   | None: 15%<br>Mild: 65.6%<br>Moderate: 18.5%<br>Severe: 0.9%    | No.<br>No mention in Introduction. Academic results ignored in Discussion.                     | 39.7% had IA and ignored academic work;<br>44.5% had AI and did not ignore academic work.                                                                                                                                                                                                                                         |

| Lead Author, Publication Date, Citation | Validity of IA question ed? | Measured against (e.g. Depression            | Age & Gender                                        | Addiction rates (Prevalence)                                               | Mentioned value of Internet for Academic work                                                                                                                                         | Results                                                                                                                                            |
|-----------------------------------------|-----------------------------|----------------------------------------------|-----------------------------------------------------|----------------------------------------------------------------------------|---------------------------------------------------------------------------------------------------------------------------------------------------------------------------------------|----------------------------------------------------------------------------------------------------------------------------------------------------|
|                                         |                             |                                              |                                                     |                                                                            |                                                                                                                                                                                       | IA correlated with:<br>• gender (F>M)                                                                                                              |
| Alfadhul, 2018 [28]                     | No                          | None                                         | Mean age 19.29±1.04<br>Female: 50.9%<br>Male: 49.1% | None-Mild: 44.5%<br>Moderate: 54.6%<br>Severe: 0.9%                        | Yes. Acknowledged in Introduction. Measured percentage of work-related time on Internet. Discussion does not discuss significance of the work-related figures on the Addiction rates. | Percentage of work-related time on Internet:<br>Normal: 67.7%<br>Addicted: 32.8%<br><br>No correlation between IA and academic performance         |
| Ali, 2019 [29]                          | No                          | None                                         | Mean age: 19.71±0.90                                | None-Mild: 46%%<br>Moderate: 53%<br>Severe: 1%<br>Males more than females. | Yes. Acknowledged in Introduction. Measured academic use, and mentioned in the Discussion, but did not question the validity of the addiction rate.                                   | 54% of students used it for work-related purposes                                                                                                  |
| Alpaslan, 2015 [30]                     | No                          | Hopelessness, Suicide Ideation and Hostility | Mean age: 20.5±1.8<br>Female: 55.8%<br>Male: 44.2%  | None: 70.4% <sup>a</sup><br>Mild: 23.3%<br>Moderate: 5.5%<br>Severe: 0.9%  | No.<br><br>The correlation between AI and higher grades found in the study dismissed “probably                                                                                        | Positive relationship between problematic internet use and Hopelessness, Suicide Ideation and Hostility.<br><br>IA correlated with:<br>• daily use |



| Lead Author, Publication Date, Citation | Validity of IA question ed?      | Measured against (e.g. Depression                                                          | Age & Gender                                         | Addiction rates (Prevalence)                                             | Mentioned value of Internet for Academic work                                                              | Results                                                                                                                                                                                                                                                                                                             |
|-----------------------------------------|----------------------------------|--------------------------------------------------------------------------------------------|------------------------------------------------------|--------------------------------------------------------------------------|------------------------------------------------------------------------------------------------------------|---------------------------------------------------------------------------------------------------------------------------------------------------------------------------------------------------------------------------------------------------------------------------------------------------------------------|
|                                         |                                  | UCLA lonelines s scale; Toronto Alexithy mia Scale (TAS); Suicide Probabil ity Scale (SPS) |                                                      |                                                                          | related to self-report of the students”                                                                    | <ul style="list-style-type: none"> <li>• years of use</li> <li>• gender (M&gt;F)</li> <li>• game playing</li> <li>• UCLA</li> <li>• TAS</li> <li>• SPS</li> <li>• higher grades</li> </ul>                                                                                                                          |
| Al-qadasi, 2018 [8]                     | No (States that it is in DSM-IV) | None                                                                                       | Mean age: 21.6±1.98.<br>Female: 49.8%<br>Male: 50.2% | None: 18.5%<br>Mild: 68.7%<br>Moderate: 12.4%<br>Severe: 0.4%            | Yes, acknowledged in Introduction. And not examined or discussed.                                          | IA correlated with: <ul style="list-style-type: none"> <li>• more than 10 friends</li> <li>• time on Internet</li> <li>• higher Internet speeds</li> </ul>                                                                                                                                                          |
| Anand, 2018 [31]                        | No                               | Psychol ogical distress and depressi on                                                    | Mean age: 19.73±1.35                                 | None: 61.8% <sup>a</sup><br>Mild: 27%<br>Moderate: 10.4%<br>Severe: 0.8% | No. No mention of academic work.<br><br>The high % use of the Internet for work ignored in the Discussion. | Internet used for: <ul style="list-style-type: none"> <li>• <i>education</i>: 8.3%</li> <li>• entertainment: 6.8%</li> <li>• messaging: 2.9%</li> <li>• <i>all</i>: 81.9%</li> </ul><br>IA correlated with: <ul style="list-style-type: none"> <li>• gender (M&gt;F)</li> <li>• amount of Internet usage</li> </ul> |

| Lead Author, Publication Date, Citation | Validity of IA questioned?                | Measured against (e.g. Depression) | Age & Gender                   | Addiction rates (Prevalence)                                               | Mentioned value of Internet for Academic work                                                                                                                                                   | Results                                                                                                                                                                                                                                                                                                                                            |
|-----------------------------------------|-------------------------------------------|------------------------------------|--------------------------------|----------------------------------------------------------------------------|-------------------------------------------------------------------------------------------------------------------------------------------------------------------------------------------------|----------------------------------------------------------------------------------------------------------------------------------------------------------------------------------------------------------------------------------------------------------------------------------------------------------------------------------------------------|
|                                         |                                           |                                    |                                |                                                                            |                                                                                                                                                                                                 | <ul style="list-style-type: none"> <li>• psychological distress</li> <li>• inverse with age</li> </ul> <p>Some balanced discussion of possible causation between psychological distress and IA.</p>                                                                                                                                                |
| Arya, 2018 [32]                         | No                                        | None                               | Female: 41.55%<br>Male: 58.45% | None-Mild: 90.54%<br>Moderate: 6.21%<br>Severe: 3.23%                      | No. No discussion of work/education related activities.                                                                                                                                         | <p>IA correlated with:</p> <ul style="list-style-type: none"> <li>• gender (M&gt;F)</li> <li>• rural background &gt; urban background</li> <li>• Internet access at home &gt; than those without.</li> </ul>                                                                                                                                       |
| Asokan, 2019 [33]                       | No (although acknowledges not in the DSM) | None                               | Female: 71.9%<br>Male: 28.1%   | None: 38.6% <sup>a</sup><br>Mild: 63.7%<br>Moderate: 35.5%<br>Severe: 0.8% | <p>Yes, Acknowledged in the Introduction. Value in medical practice also noted.</p> <p>Mentions its academic use briefly, but does not lead to any insights about the value of “addiction”.</p> | <p>Usage:</p> <ul style="list-style-type: none"> <li>• 12.5% who use it for academic work were in the non-addicted group,</li> <li>• 87.5% were in the addicted group.</li> </ul> <p>IA correlated with:</p> <ul style="list-style-type: none"> <li>• gender (M&gt;F)</li> <li>• time spent on Internet</li> <li>• negative with grades</li> </ul> |

| Lead Author, Publication Date, Citation | Validity of IA question ed?                           | Measured against (e.g. Depression                                                      | Age & Gender                                                    | Addiction rates (Prevalence)                                                       | Mentioned value of Internet for Academic work                                 | Results                                                                                                                                                                                                                                                                |
|-----------------------------------------|-------------------------------------------------------|----------------------------------------------------------------------------------------|-----------------------------------------------------------------|------------------------------------------------------------------------------------|-------------------------------------------------------------------------------|------------------------------------------------------------------------------------------------------------------------------------------------------------------------------------------------------------------------------------------------------------------------|
| Bakarman, 2017 [34]                     | No                                                    | Depression (Center for epidemiological studies depression scale for children (CES-DC)) | Mean age: 22.2±1.0<br>Female: 57.8%<br>Male: 42.2% <sup>a</sup> | IA <sup>b</sup> :<br>None: 50.6% <sup>a</sup><br>Possible: 46.3%<br>Addicted: 3.1% | Acknowledged in the Introduction.<br><br>Impact not discussed elsewhere.      | IA correlated with: <ul style="list-style-type: none"> <li>• gender (M &gt; F)</li> <li>• level of Depression</li> <li>• inverse with year of study.</li> </ul>                                                                                                        |
| Balhara, 2015 [35]                      | No, (although acknowledges that it is not in the DSM) | None                                                                                   | Mean age: 21.23±2.66<br>Female: 50.8%<br>Male: 49.2%            | None: 50.3% <sup>a</sup><br>Mild: 38.7%<br>Moderate: 10.5%<br>Severe: 0.5%         | No. No discussion of work-related activities.                                 | IA correlated with: <ul style="list-style-type: none"> <li>• gender (M&gt;F)</li> <li>• average duration of daily use of the internet</li> <li>• social networking</li> <li>• chatting</li> <li>• gaming</li> <li>• shopping</li> <li>• viewing pornography</li> </ul> |
| Bansode, 2019 [36]                      | Yes - In the conclusion,                              | None                                                                                   | Female: 43.4%<br>Male: 56.6%                                    | Less than average user: 6.87%<br>Average user: 67.47                               | Not in Introduction.<br><br>Their high education figures are referred to, but | Internet used for: <ul style="list-style-type: none"> <li>• social networking: 73.49%</li> <li>• <i>education</i>: 68.87%</li> </ul>                                                                                                                                   |

| Lead Author, Publication Date, Citation | Validity of IA question ed?                                                    | Measur ed against (e.g. Depress ion                              | Age & Gender                        | Addiction rates (Prevalence)                                                                  | Mentioned value of Internet for Academic work        | Results                                                                                                                                                                                   |
|-----------------------------------------|--------------------------------------------------------------------------------|------------------------------------------------------------------|-------------------------------------|-----------------------------------------------------------------------------------------------|------------------------------------------------------|-------------------------------------------------------------------------------------------------------------------------------------------------------------------------------------------|
|                                         | mention that it is debated and not in DSM.                                     |                                                                  |                                     | Over-users: 12.05<br>Addicts: 6.38                                                            | do not impact on their interpretation of IA.         | <ul style="list-style-type: none"> <li>• downloading: 62.65%</li> <li>• gaming: 12.05%</li> </ul> IA correlated with: <ul style="list-style-type: none"> <li>• gender (M&gt;F)</li> </ul> |
| Berner, 2014) [37]                      | Yes, acknowl edges that IA is not firmly establish ed                          | Depressi on (Goldber g's General Health Question naire (GHQ-12)) | Mean age: 20.78±1.79<br>Male: 58.3% | IAT:<br>Non-problematic (<50 on score):88.3% <sup>a</sup><br>Problematic (≥50 on score):11.7% | No.<br><br>No mention of academic work in the paper. | IA correlated with: <ul style="list-style-type: none"> <li>• GHQ-12</li> </ul>                                                                                                            |
| Boonvisudhi, 2017 [38]                  | No, although mentions that there is no consensu s on the clinical definitio n. | Depressi on (The Patient Health Question naire (PHQ-9))          |                                     | Mean IA score = 3.27;<br><br>24.4% had possible IA.                                           | No.                                                  | IA correlated with: <ul style="list-style-type: none"> <li>• depression</li> <li>• academic problems</li> <li>• health problems</li> </ul>                                                |

| Lead Author, Publication Date, Citation | Validity of IA question ed? | Measured against (e.g. Depression)                                                                           | Age & Gender                                          | Addiction rates (Prevalence)                                                                                                                                    | Mentioned value of Internet for Academic work                                                                                                                                                                         | Results                                                                                                                                                                                                                                                                                                                              |
|-----------------------------------------|-----------------------------|--------------------------------------------------------------------------------------------------------------|-------------------------------------------------------|-----------------------------------------------------------------------------------------------------------------------------------------------------------------|-----------------------------------------------------------------------------------------------------------------------------------------------------------------------------------------------------------------------|--------------------------------------------------------------------------------------------------------------------------------------------------------------------------------------------------------------------------------------------------------------------------------------------------------------------------------------|
| Capetillo-Ventura, 2015 [39]            | No                          | Mental Health General Health Question naire, and the Zuckerman-Kuhlman Personality Question naire III (ZKPQ) | Mean age: 21.24±3.046<br>Female: 46.2%<br>Male: 53.8% | IAT<br>Mean score: 19.72<br><br>IA:<br>had complete control over its use (20-39): 91.8%<br>frequent problems: (40-69): 8%<br>significant problems: (>70): 0.2%. | Yes<br>Acknowledged in Introduction.<br><br>The extremely high use for education and research ignored in the discussion. It is mentioned in the conclusion, but does not impact of the interpretation of the results. | Internet main usage for:<br><ul style="list-style-type: none"> <li>• social networks: 43.86%</li> <li>• <i>academic and research activities</i>: 32.95%</li> <li>• entertainment/leisure in 23.18%.</li> </ul><br>IA correlated with:<br><ul style="list-style-type: none"> <li>• gender (M&gt;F)</li> </ul>                         |
| Chakraborti, 2016 [40]                  | No                          | Resilience scale and student stress scale (SSS).                                                             | Mean age: 20.41±1.64<br>Female: 35.7%<br>Male: 64.3%  | IA:<br>Moderate users: 80.6%<br><br>19.4% were problem users.                                                                                                   | No.<br><br>Mentioned in the Discussion (that is among the highest uses of the Internet), but not taken into account with the interpretation.                                                                          | Internet used for:<br><ul style="list-style-type: none"> <li>• social networking: 76.5%</li> <li>• <i>academic activity and research</i>: 74.5%</li> </ul><br>IA correlated with:<br><ul style="list-style-type: none"> <li>• gender (M&gt;F)</li> <li>• SSS total score</li> <li>• total number of stressful life events</li> </ul> |

| Lead Author, Publication Date, Citation        | Validity of IA question ed?      | Measured against (e.g. Depression | Age & Gender                                              | Addiction rates (Prevalence)                                            | Mentioned value of Internet for Academic work                                                                                                                                                    | Results                                                                                                                                                                                                                                                                                                                                    |
|------------------------------------------------|----------------------------------|-----------------------------------|-----------------------------------------------------------|-------------------------------------------------------------------------|--------------------------------------------------------------------------------------------------------------------------------------------------------------------------------------------------|--------------------------------------------------------------------------------------------------------------------------------------------------------------------------------------------------------------------------------------------------------------------------------------------------------------------------------------------|
|                                                |                                  |                                   |                                                           |                                                                         |                                                                                                                                                                                                  | <ul style="list-style-type: none"> <li>negatively correlated with resilience</li> </ul>                                                                                                                                                                                                                                                    |
| Chathoth, 2013 [41]<br><br>Chathoth, 2014 [42] | No                               | None                              | Mean age: 18.49± 0.71<br><br>Female: 62.2%<br>Male: 37.8% | IA:<br>Normal: 23.33%<br>Mild: 57.77%<br>Moderate: 18.88%<br>Severe: 0% | No<br><br>Brief mention in the Discussion, but not taken into account on the interpretation of the results.                                                                                      | Internet used for: <ul style="list-style-type: none"> <li>social networking: 97.8%</li> <li>e-mail: 87.8%</li> <li>education: 82.2%</li> <li>entertainment: 82.2%</li> </ul> IA correlated with: <ul style="list-style-type: none"> <li>sleep impairment</li> <li>excessive daytime sleepiness</li> <li>environmental stressors</li> </ul> |
| Chaudhari, 2015 [43]                           | No, but acknowledges not in DSM. | None                              | Mean age: 19.90±1.37<br>Female: 56.74%<br>Male: 43.26%    | IA:<br>None: 41.13%<br>Mild: 51.42%<br>Moderate: 7.45%                  | Acknowledged in Introduction. Although, give a list of 5 aspects that make students more vulnerable to AI, and education is not mentioned.<br><br>No mention of academic work in the Discussion. | IA correlated with: <ul style="list-style-type: none"> <li>gender (M&gt;F)</li> <li>staying in private accommodation</li> <li>lesser age of first internet use</li> <li>using mobile for internet access</li> <li>higher expenditure on internet</li> <li>staying online for longer time</li> </ul>                                        |

| Lead Author, Publication Date, Citation | Validity of IA question ed? | Measured against (e.g. Depression | Age & Gender                                          | Addiction rates (Prevalence)                         | Mentioned value of Internet for Academic work                                                                                                                                                                                                                  | Results                                                                                                                                                                                                                                                                                                                                                                                                                                           |
|-----------------------------------------|-----------------------------|-----------------------------------|-------------------------------------------------------|------------------------------------------------------|----------------------------------------------------------------------------------------------------------------------------------------------------------------------------------------------------------------------------------------------------------------|---------------------------------------------------------------------------------------------------------------------------------------------------------------------------------------------------------------------------------------------------------------------------------------------------------------------------------------------------------------------------------------------------------------------------------------------------|
|                                         |                             |                                   |                                                       |                                                      |                                                                                                                                                                                                                                                                | <ul style="list-style-type: none"> <li>• using internet for social networking, online videos</li> <li>• watching website with sexual content</li> </ul>                                                                                                                                                                                                                                                                                           |
| Chaudhuri, 2019 [44]                    | No                          | The Duke Health Profile           |                                                       | IA:<br>None: 25.87<br>Mild: 58.70<br>Moderate: 15.42 | <p>No.</p> <p>High usage for educational purposes mentioned in Discussion, but does not affect the interpretation of the IA.</p> <p>Recommendations include avoid internet at night, during classes and lectures, in spite of the 83% usage for education.</p> | <p>Internet used for:</p> <ul style="list-style-type: none"> <li>• <i>education</i>: 83.0%</li> <li>• social networking: 76%</li> </ul> <p>IA correlated with:</p> <ul style="list-style-type: none"> <li>• Anxiety score</li> <li>• Depression score</li> </ul> <p>IA negatively correlated with:</p> <ul style="list-style-type: none"> <li>• Physical health score</li> <li>• Mental health score</li> <li>• Perceived health score</li> </ul> |
| Ching, 2017 [45]<br><br>Mooi, 2019 [46] | No                          | Depression                        | Mean age: 21.60±1.50<br>Female: 63.4%<br>Males: 36.6% | Addicted: 36.9%                                      | Yes.<br>Acknowledged in Introduction as important for medical students for “literature searches and searching for relevant medical information.”                                                                                                               | <p><i>51.6% use Internet for education purposes.</i></p> <p>IA correlated with:</p> <ul style="list-style-type: none"> <li>• gender (M&gt;F)</li> <li>• duration of internet use</li> <li>• DASS-21 Score</li> </ul>                                                                                                                                                                                                                              |

| Lead Author, Publication Date, Citation | Validity of IA question ed? | Measured against (e.g. Depression       | Age & Gender                 | Addiction rates (Prevalence)                                                                                | Mentioned value of Internet for Academic work                                                                                                                                                                                                 | Results                                                                                                                                                                                                                                                                                                                                                                          |
|-----------------------------------------|-----------------------------|-----------------------------------------|------------------------------|-------------------------------------------------------------------------------------------------------------|-----------------------------------------------------------------------------------------------------------------------------------------------------------------------------------------------------------------------------------------------|----------------------------------------------------------------------------------------------------------------------------------------------------------------------------------------------------------------------------------------------------------------------------------------------------------------------------------------------------------------------------------|
|                                         |                             |                                         |                              |                                                                                                             | The education usage is not mentioned in the Discussion, and does not influence the interpretation.                                                                                                                                            |                                                                                                                                                                                                                                                                                                                                                                                  |
| Damor, 2018 [47]                        | No                          | None                                    | Female: 48.6%<br>Male: 51.4% | IA: Less than average users: 23.4%<br>Average online users: 59.1%<br>Possible addict: 17.2%<br>Addict: 0.3% | Yes, Acknowledged in Introduction.<br><br>Mentioned in the Discussion, but no impact on the interpretation of results.                                                                                                                        | Internet used for: <ul style="list-style-type: none"> <li>• social media: 65.2%</li> <li>• <i>academic literature search: 19.4%</i></li> </ul>                                                                                                                                                                                                                                   |
| Daripelly, 2017 [48]                    | No                          | General health questionnaire (GHQ - 12) | Female: 49.4%<br>Male: 50.6% | IA (Medical students only):<br>Non-Addict: 46.3%<br>Potential Addict: 27.5%<br>Internet Addict: 21.6%       | No mention in the Introduction.<br><br>The results show that, overall, and for the “potential addicts” the most common use of the Internet is for research purposes. This is ignored in the Discussion and the interpretation of the results. | Internet most commonly used for: <ul style="list-style-type: none"> <li>• <i>research: 35.1%</i></li> <li>• socialization: 34.7%</li> <li>• entertainment: 24.6%</li> <li>• others: 5.5%</li> </ul><br>IA correlated with <ul style="list-style-type: none"> <li>• gender (M&gt;F)</li> <li>• parents’ level of education</li> <li>• more hours of daily internet use</li> </ul> |



| Lead Author, Publication Date, Citation | Validity of IA question ed? | Measured against (e.g. Depression | Age & Gender                                                      | Addiction rates (Prevalence)                            | Mentioned value of Internet for Academic work                                   | Results                                                                                                                                                                                                                                                                                                                                                                                   |
|-----------------------------------------|-----------------------------|-----------------------------------|-------------------------------------------------------------------|---------------------------------------------------------|---------------------------------------------------------------------------------|-------------------------------------------------------------------------------------------------------------------------------------------------------------------------------------------------------------------------------------------------------------------------------------------------------------------------------------------------------------------------------------------|
|                                         |                             |                                   |                                                                   |                                                         |                                                                                 | <ul style="list-style-type: none"> <li>• use the internet more frequently each week</li> <li>• use the internet for socialization and entertainment</li> <li>• GHQ scores</li> </ul>                                                                                                                                                                                                      |
| Duică, 2017 [49]                        | No                          | None                              |                                                                   | IA:<br>No/Mild: 91.5%<br>Moderate: 8.2%<br>Severe: 0.4% | Acknowledges some positive contribution of Internet to work-related activities. | <p>Found high use of the Internet for work, and “those with internet addiction are the ones that use the internet as information source for professional development.”</p> <p>IA negatively correlated with:</p> <ul style="list-style-type: none"> <li>• watching medical videos before exams</li> <li>• internet socialization (including topics from professional training)</li> </ul> |
| Fatehi, 2016 [50]                       | No                          | WHOQ OL-BREF                      | Mean age: 22.57±1.24<br>Female: 55.7% <sup>a</sup><br>Male: 44.3% | IA:<br>Normal (<50): 83.9%<br>Addicted (>= 50): 16.1%   | No.<br><br>No mention of the Mentions Internet as a tool for work.              | <p>GPA lower in addicted group.</p> <p>IA negatively correlated with:</p>                                                                                                                                                                                                                                                                                                                 |

| Lead Author, Publication Date, Citation | Validity of IA question ed?                             | Measured against (e.g. Depression  | Age & Gender                                             | Addiction rates (Prevalence)                                 | Mentioned value of Internet for Academic work                                                                                                  | Results                                                                                                                                                                                                                                                                                                                                                                     |
|-----------------------------------------|---------------------------------------------------------|------------------------------------|----------------------------------------------------------|--------------------------------------------------------------|------------------------------------------------------------------------------------------------------------------------------------------------|-----------------------------------------------------------------------------------------------------------------------------------------------------------------------------------------------------------------------------------------------------------------------------------------------------------------------------------------------------------------------------|
|                                         |                                                         |                                    |                                                          |                                                              |                                                                                                                                                | <ul style="list-style-type: none"> <li>• average of QOL domains</li> </ul>                                                                                                                                                                                                                                                                                                  |
| Gaddala, 2017 [51]                      | No                                                      | None                               | Female: 64%<br>Male: 36%                                 | IA:<br>None: 24%<br>Mild: 61%<br>Moderate: 14%<br>Severe: 1% | Acknowledged in Introduction.<br><br>The fact that 100% of the student use the Internet for educational purposes is ignored in the discussion. | <i>100% of the students use the Internet for educational purposes.</i><br><br>IA correlated with: <ul style="list-style-type: none"> <li>• Gender (M&gt;F)</li> </ul>                                                                                                                                                                                                       |
| Gedam, 2016 [52]                        | No. Acknowledge the work by [120], but still proceeded. | Depression Mental health inventory | Mean age: 19.71±0.97<br><br>Female: 63.5%<br>Male: 36.5% | IA:<br>None/Mild: 81.5%<br>Moderate: 17.3%<br>Severe: 1.2%   | Acknowledged in the Introduction.<br><br>High usage of Internet for educational work is not mentioned in the discussion.                       | Internet used for: <ul style="list-style-type: none"> <li>• social networking: 31.86%</li> <li>• education: 28.92%</li> <li>• games: 17.91%</li> <li>• recreational: 17.32%</li> <li>• others: 3.96%</li> </ul><br>IA correlated with: <ul style="list-style-type: none"> <li>• gender (M&gt;F)</li> <li>• computer ownership</li> <li>• purpose of internet use</li> </ul> |
| Gedam, 2016 [53]                        | No                                                      | Anxiety, depression, distress      | Mean age: 19.57±1.52<br>Female: 62.8%                    | IA<br>None/Mild: 76.7%<br>Moderate: 21.0%<br>Severe: 2.3%    | Yes. Acknowledged in Introduction.<br>High usage of Internet for educational work is not                                                       | Internet used for: <ul style="list-style-type: none"> <li>• social networking: 31.08%</li> <li>• education: 28.87%</li> <li>• recreational: 18.26%</li> <li>• games: 16.69%</li> </ul>                                                                                                                                                                                      |

| Lead Author, Publication Date, Citation | Validity of IA question ed?                                         | Measured against (e.g. Depression | Age & Gender        | Addiction rates (Prevalence)                               | Mentioned value of Internet for Academic work                                                                                  | Results                                                                                                                                                                                                                                                                                                                                                                                                                                        |
|-----------------------------------------|---------------------------------------------------------------------|-----------------------------------|---------------------|------------------------------------------------------------|--------------------------------------------------------------------------------------------------------------------------------|------------------------------------------------------------------------------------------------------------------------------------------------------------------------------------------------------------------------------------------------------------------------------------------------------------------------------------------------------------------------------------------------------------------------------------------------|
|                                         |                                                                     |                                   | Males: 37.2%        |                                                            | mentioned in the discussion.                                                                                                   | <ul style="list-style-type: none"> <li>• others: 5.07%</li> </ul> <p>IA correlated with:</p> <ul style="list-style-type: none"> <li>• gender: (M&gt;F)</li> <li>• anxiety</li> <li>• depression</li> <li>• loss of emotional / behavioral control</li> <li>• psychological distress</li> </ul> <p>IA negatively correlated with:</p> <ul style="list-style-type: none"> <li>• life satisfaction</li> <li>• psychological well-being</li> </ul> |
| George, 2019 [9]                        | No. And says that the DSM does include internet addiction disorder. | None                              | Mean age: 21.3±1.25 | IA<br>None: 29% <sup>a</sup><br>Mild: 54%<br>Moderate: 17% | Acknowledged in Introduction.<br><br>Did not ask the students what they did, and so this aspect not covered in the Discussion. | <p>IA correlated with:</p> <ul style="list-style-type: none"> <li>• gender (M&gt;F)</li> <li>• mobile/tablet usage</li> <li>• eye strain</li> <li>• time to initiate sleep</li> <li>• frequency of sleep trouble</li> <li>• hours spent on internet</li> <li>• money spent</li> <li>• presence of backache</li> <li>• appetite change</li> </ul>                                                                                               |

| Lead Author, Publication Date, Citation | Validity of IA question ed? | Measured against (e.g. Depression)               | Age & Gender                                                           | Addiction rates (Prevalence)                                   | Mentioned value of Internet for Academic work                                                                                                                                                                       | Results                                                                                                                                                                                                                                                                                                                                                                                                                                                                                                    |
|-----------------------------------------|-----------------------------|--------------------------------------------------|------------------------------------------------------------------------|----------------------------------------------------------------|---------------------------------------------------------------------------------------------------------------------------------------------------------------------------------------------------------------------|------------------------------------------------------------------------------------------------------------------------------------------------------------------------------------------------------------------------------------------------------------------------------------------------------------------------------------------------------------------------------------------------------------------------------------------------------------------------------------------------------------|
| Ghamari, 2011 [54]                      | No                          | None                                             | Mean age: 21 <sup>a</sup><br>Female: 64.9%<br>Male: 35.1% <sup>a</sup> | IA:<br>Mean score: 32.74±14.52<br>Moderate: 8%<br>Severe: 2.8% | Acknowledged in Introduction.<br><br>The fact that the students used the Internet mostly for work is repeated in the Discussion, but does not influence the researchers' interpretation of their view on addiction. | Internet used for: <ul style="list-style-type: none"> <li>• <i>research and scientific surveys</i>: 48.4%</li> <li>• computer games and hobbies: 20.5%</li> <li>• checking email: 9.8%</li> <li>• political and social news: 6.5%</li> <li>• chat rooms: 5.6%</li> </ul> IA correlated with: <ul style="list-style-type: none"> <li>• gender (M&gt;F)</li> <li>• marital status (M&gt;S)</li> <li>• father's job</li> <li>• knowledge about computer and internet</li> <li>• educational level.</li> </ul> |
| Ghanate, 2019 [55]                      | No                          | Becks Depression scale; Beck's Anxiety Inventory | Female: 53.14%<br>Male: 46.8%                                          | IA:<br>Normal: 80.9%<br>Moderate: 17.4%<br>Severe: 1.7%        | Acknowledged in Introduction.<br><br>In spite of these work figures, this is not mentioned in the Discussion, nor does it                                                                                           | Internet used for: <ul style="list-style-type: none"> <li>• entertainment: 81%</li> <li>• <i>academic work</i>: 36.1%</li> <li>• social friendships: 35%</li> <li>• loneliness: 11.4%</li> </ul> IA correlated with: <ul style="list-style-type: none"> <li>• Anxiety</li> </ul>                                                                                                                                                                                                                           |

| Lead Author, Publication Date, Citation | Validity of IA question ed? | Measured against (e.g. Depression | Age & Gender                 | Addiction rates (Prevalence)                                         | Mentioned value of Internet for Academic work                                                                                                                                                                                                                                                                                             | Results                                                                                                                                                                                                                                                                                                                        |
|-----------------------------------------|-----------------------------|-----------------------------------|------------------------------|----------------------------------------------------------------------|-------------------------------------------------------------------------------------------------------------------------------------------------------------------------------------------------------------------------------------------------------------------------------------------------------------------------------------------|--------------------------------------------------------------------------------------------------------------------------------------------------------------------------------------------------------------------------------------------------------------------------------------------------------------------------------|
|                                         |                             |                                   |                              |                                                                      | impact on the interpretation of the results                                                                                                                                                                                                                                                                                               | <ul style="list-style-type: none"> <li>• Depression</li> </ul>                                                                                                                                                                                                                                                                 |
| Ghosh, 2018 [56]                        | No                          | None                              | Female: 44.5%<br>Male: 55.5% | IA:<br>None: 44.5%<br>Mild: 34.8%<br>Moderate: 19.4%<br>Severe: 1.3% | <p>Mentioned in the Abstract, but not in the Paper's Introduction.</p> <p>Discussion talks about the importance of medical persons using the Internet to stay up to date, does not affect the interpretation of these results, and does not addressed the anomaly that students appear to not access their learning materials online.</p> | <p>Internet used for:</p> <ul style="list-style-type: none"> <li>• online chatting: 78.7%</li> <li>• social networking: 61.9%</li> </ul> <p>IA correlated with:</p> <ul style="list-style-type: none"> <li>• gender (M&gt;F)</li> <li>• duration of daily usage</li> <li>• amount of money spent for Internet usage</li> </ul> |

| Lead Author, Publication Date, Citation | Validity of IA question ed? | Measured against (e.g. Depression | Age & Gender                                               | Addiction rates (Prevalence)                                             | Mentioned value of Internet for Academic work                                                                                                                              | Results                                                                                                                                                                                                                                                                                                              |
|-----------------------------------------|-----------------------------|-----------------------------------|------------------------------------------------------------|--------------------------------------------------------------------------|----------------------------------------------------------------------------------------------------------------------------------------------------------------------------|----------------------------------------------------------------------------------------------------------------------------------------------------------------------------------------------------------------------------------------------------------------------------------------------------------------------|
| Güzel, 2018 [57]                        | No                          | None                              | Age range from 18-26.<br>Female: 54.13%<br>Male: 45.87%    | [Did not use Young's scale]                                              | Acknowledged in Introduction.<br><br>In spite of the high usage for educational work, no reference is made in the Discussion, and it does not affect their interpretation. | Internet used for: <ul style="list-style-type: none"> <li>• communicational purposes: 94.5%</li> <li>• <i>educational purposes</i>: 68.9%</li> </ul> IA correlated with: <ul style="list-style-type: none"> <li>• some physical complaints</li> <li>• insomnia</li> <li>• time spent on the internet</li> </ul>      |
| Hajare, 2017 [58]                       | No                          | None                              | Age 21.2 <sup>a</sup><br><br>Female: 42.54%<br>Male: 57.4% | IA:<br>None: 33.58%<br>Mild: 23.38%<br>Moderate: 39.55%<br>Severe: 3.48% | No mention in Introduction, or anywhere else in the paper.                                                                                                                 | IA correlated with: <ul style="list-style-type: none"> <li>• both the parents working</li> <li>• had internet connections at their home or hostel room</li> <li>• using internet for more than 5 years</li> <li>• used internet for more than 28 hrs/week</li> </ul><br>No correlation with age or gender was found. |

| Lead Author, Publication Date, Citation | Validity of IA question ed? | Measured against (e.g. Depression) | Age & Gender                                                      | Addiction rates (Prevalence)                                         | Mentioned value of Internet for Academic work                                                                                                                                       | Results                                                                                                                                                                                                                                                                                                                                                                                                                                                                                                                                                                                                                                                |
|-----------------------------------------|-----------------------------|------------------------------------|-------------------------------------------------------------------|----------------------------------------------------------------------|-------------------------------------------------------------------------------------------------------------------------------------------------------------------------------------|--------------------------------------------------------------------------------------------------------------------------------------------------------------------------------------------------------------------------------------------------------------------------------------------------------------------------------------------------------------------------------------------------------------------------------------------------------------------------------------------------------------------------------------------------------------------------------------------------------------------------------------------------------|
| Hamissi, 2013 [59]                      | No                          | Emotional Intelligence             | Mean age: 23.26±3.36<br>Female: 31.8% <sup>a</sup><br>Male: 68.2% | IA:<br>Normal: 38.3%<br>Mild: 43.8%<br>Moderate: 15.9%<br>Severe: 2% | No<br><br>No mention of education influence at all, in spite of the high usage of the Internet for Education, and in spite of the fact that the PhD students use the Internet more. | Internet used for:<br><ul style="list-style-type: none"> <li>• <i>read articles</i>: 33.8%</li> <li>• download music/images: 7.7%</li> <li>• chat: 1.2%</li> <li>• games: 1.5%</li> <li>• not at all: 1%</li> </ul><br>Usage of Computer:<br><ul style="list-style-type: none"> <li>• games: 43.8%</li> <li>• <i>education</i>: 25.0%</li> <li>• communication: 15.4%</li> <li>• entertainment: 5.1%</li> <li>• not at all: 1%</li> </ul><br>IA correlated with:<br><ul style="list-style-type: none"> <li>• gender (M&gt;F)</li> <li>• education grade: PhD having the highest.</li> <li>• Internet usage</li> <li>• history of depression</li> </ul> |
| Haque, 2016 [60]                        | No                          | None                               | Mean age: 21.99±1.535                                             | Both male and female suffered from mild IA                           | Acknowledged in Introduction.                                                                                                                                                       | Internet used for:<br><ul style="list-style-type: none"> <li>• social networking: 56.2%</li> <li>• entertainment: 39.7%</li> </ul>                                                                                                                                                                                                                                                                                                                                                                                                                                                                                                                     |

| Lead Author, Publication Date, Citation | Validity of IA question ed? | Measured against (e.g. Depression | Age & Gender                                               | Addiction rates (Prevalence) | Mentioned value of Internet for Academic work                                         | Results                                                                                                                                                                                                                                                                                                                                                                                                               |
|-----------------------------------------|-----------------------------|-----------------------------------|------------------------------------------------------------|------------------------------|---------------------------------------------------------------------------------------|-----------------------------------------------------------------------------------------------------------------------------------------------------------------------------------------------------------------------------------------------------------------------------------------------------------------------------------------------------------------------------------------------------------------------|
|                                         |                             |                                   | IA Mean Scores:<br>Female: 41.4±13.05<br>Males: 44.9±14.05 |                              | Work usage in Results ignored in the Discussion. No reasons given.                    | <ul style="list-style-type: none"> <li>• <i>educational</i>: 34.9%</li> <li>• <i>research</i>: 12.3%</li> <li>• email: 12.3%</li> <li>• conferences: 3%</li> </ul> <p>IA negative correlated with:</p> <ul style="list-style-type: none"> <li>• year of study</li> <li>• age</li> </ul> <p>IA did not correlate with:</p> <ul style="list-style-type: none"> <li>• usage</li> <li>• work</li> <li>• gender</li> </ul> |
| Hayat, 2020 [61]                        | No                          | Procrastination                   | Female: 57.1%<br>Male: 42.9%                               | IA: Severe: 3.43%            | Yes                                                                                   | IA correlated with: <ul style="list-style-type: none"> <li>• gender (M&gt;F)</li> <li>• living in dorms</li> <li>• procrastination</li> </ul>                                                                                                                                                                                                                                                                         |
| Hussain, 2018 [62]                      | No                          | None                              | Female: 56.7%<br>Male: 43.3%                               | IA Prevalence: 41.7%.        | No Acknowledged in Introduction.<br><br>Academic figures not mentioned in Discussion. | Internet mainly used for: <ul style="list-style-type: none"> <li>• entertainment: 38.3%<sup>a</sup></li> <li>• social: 33.3%</li> <li>• <i>research/academics</i>: 15.8%</li> <li>• other: 12.5%</li> </ul>                                                                                                                                                                                                           |



| Lead Author, Publication Date, Citation | Validity of IA question ed? | Measured against (e.g. Depression | Age & Gender                                             | Addiction rates (Prevalence)                                          | Mentioned value of Internet for Academic work                                                                                                                                                                              | Results                                                                                                                                                                                                                                                                                                                                                                                                                     |
|-----------------------------------------|-----------------------------|-----------------------------------|----------------------------------------------------------|-----------------------------------------------------------------------|----------------------------------------------------------------------------------------------------------------------------------------------------------------------------------------------------------------------------|-----------------------------------------------------------------------------------------------------------------------------------------------------------------------------------------------------------------------------------------------------------------------------------------------------------------------------------------------------------------------------------------------------------------------------|
|                                         |                             |                                   |                                                          |                                                                       |                                                                                                                                                                                                                            | IA correlated with: <ul style="list-style-type: none"> <li>• year of study (2nd &gt; 3rd)</li> <li>• Type B personality &gt; Type A</li> </ul>                                                                                                                                                                                                                                                                              |
| Ja'ffar, 2019 [63]                      | No                          | None                              | Female: 59.32% <sup>a</sup><br>Male: 40.68% <sup>a</sup> | IA:<br>None: 10.6%<br>Mild: 40.3%<br>Moderate: 45.6%<br>Severe: 3.4%  | Acknowledged in Introduction.<br><br>Mentioned only<br><br>No significant association between IA and educational use, but the fact that 56% of the students use it for educational purposes ignored in the interpretation. | Internet used for: <ul style="list-style-type: none"> <li>• social network: 89.7</li> <li>• education: 56.3%</li> <li>• gaming: 30.4</li> <li>• e-mail: 20.2</li> </ul> IA Correlated with: <ul style="list-style-type: none"> <li>• hours spent online per day</li> </ul> No correlations with: gender, parents' marital status, academic grade, residence and parents' level of education, years of internet use, gaming. |
| Jain, 2018 [64]                         | No                          | None                              | Female: 49.4%<br>Male: 50.6%                             | IA:<br>Normal: 6.7%<br>Mild: 38.7%<br>Moderate: 49.3%<br>Severe: 5.3% | Acknowledged in Introduction.<br><br>High use for Academic work ignored in the interpretation.                                                                                                                             | Internet used for: <ul style="list-style-type: none"> <li>• chatting: 100%</li> <li>• YouTube: 100%</li> <li>• online friendship/relationship: 94%</li> <li>• <i>academic work</i>: 69.3%</li> </ul>                                                                                                                                                                                                                        |

| Lead Author, Publication Date, Citation | Validity of IA question ed?             | Measured against (e.g. Depression | Age & Gender                              | Addiction rates (Prevalence)                                         | Mentioned value of Internet for Academic work                                                        | Results                                                                                                                                                                                                                                                                                                                                                                                                             |
|-----------------------------------------|-----------------------------------------|-----------------------------------|-------------------------------------------|----------------------------------------------------------------------|------------------------------------------------------------------------------------------------------|---------------------------------------------------------------------------------------------------------------------------------------------------------------------------------------------------------------------------------------------------------------------------------------------------------------------------------------------------------------------------------------------------------------------|
|                                         |                                         |                                   |                                           |                                                                      |                                                                                                      | <ul style="list-style-type: none"> <li>• movies: 62.7%</li> <li>• shopping: 58%</li> <li>• games: 41.3%</li> <li>• pornography: 14.7%</li> </ul> <p>IA correlated with:</p> <ul style="list-style-type: none"> <li>• staying in hostel and living single</li> <li>• usage of smart phone</li> <li>• preferring online shopping</li> <li>• preferring online studying.</li> </ul> <p>No correlation with gender.</p> |
| Javaeed, 2019 [65]                      | No, but mentions that it is not in DSM. | DASS21 for depressionNone         | Female: 64.3% <sup>a</sup><br>Male: 35.7% | IA:<br>None: 3.3.%<br>Mild: 44.3%<br>Moderate: 51.0%<br>Severe: 1.4% | Acknowledged in the Introduction.<br><br>No further mention of Internet for work-related activities. | IA Correlated with: <ul style="list-style-type: none"> <li>• depression</li> <li>• stress</li> </ul>                                                                                                                                                                                                                                                                                                                |
| Javaeed, 2020) [66]                     | No                                      | None                              | Female: 59.2%<br>Male: 40.8% <sup>a</sup> | IA:<br>None: 0.9%<br>Mild: 12.0%<br>Moderate: 58.9%<br>Severe: 28.2% | Yes, in Introduction. No further mention of value to work.                                           | IA correlated with: <ul style="list-style-type: none"> <li>• year of study (third year students scoring the highest)</li> </ul>                                                                                                                                                                                                                                                                                     |

| Lead Author, Publication Date, Citation | Validity of IA questioned? | Measured against (e.g. Depression)                                                   | Age & Gender                                     | Addiction rates (Prevalence)                                       | Mentioned value of Internet for Academic work                                                                     | Results                                                                                                                                                                                                                                              |
|-----------------------------------------|----------------------------|--------------------------------------------------------------------------------------|--------------------------------------------------|--------------------------------------------------------------------|-------------------------------------------------------------------------------------------------------------------|------------------------------------------------------------------------------------------------------------------------------------------------------------------------------------------------------------------------------------------------------|
|                                         |                            |                                                                                      |                                                  |                                                                    |                                                                                                                   | <p>IA negatively correlated with:</p> <ul style="list-style-type: none"> <li>• academic performance</li> </ul> <p>IA did not correlate with age or gender.</p>                                                                                       |
| Kannan, 2019 [67]                       | No                         | Auditory reaction time-ART, visual reaction time VRT<br>Heart Rate Variability (HRV) | Female: 36.8%<br>Male: 63.2%                     | IA:<br>Not: 82.6% <sup>a</sup><br>Addict: 17.4%                    | No mention of it in the paper.                                                                                    | <p>Auditory reaction time was significantly prolonged in the internet addicts compared to the non-addicts.</p> <p>IA correlated with:</p> <ul style="list-style-type: none"> <li>• gender (M&gt;F)</li> </ul>                                        |
| Kapadia, 2015 [68]                      | No                         | None                                                                                 | Mean age: 21.75±2.96<br>Female: 37%<br>Male: 63% | IA:<br>Normal: 17.5%<br>Mild: 62.5%<br>Moderate: 20%<br>Severe: 0% | <p>No, Not mentioned in Introduction.</p> <p>Results of high use for study repeated in the Discussion, but no</p> | <p>Internet used for:</p> <ul style="list-style-type: none"> <li>• entertainment: 83.5%</li> <li>• <i>study</i>: 80.5%</li> <li>• chatting: 80.5%</li> <li>• email: 61.5%</li> <li>• online shopping: 61%</li> <li>• <i>research</i>: 49%</li> </ul> |

| Lead Author, Publication Date, Citation | Validity of IA question ed?           | Measured against (e.g. Depression                       | Age & Gender                 | Addiction rates (Prevalence)                            | Mentioned value of Internet for Academic work                                                                                                                                                                | Results                                                                                                                                                                                                                                                                          |
|-----------------------------------------|---------------------------------------|---------------------------------------------------------|------------------------------|---------------------------------------------------------|--------------------------------------------------------------------------------------------------------------------------------------------------------------------------------------------------------------|----------------------------------------------------------------------------------------------------------------------------------------------------------------------------------------------------------------------------------------------------------------------------------|
|                                         |                                       |                                                         |                              |                                                         | significance of that figure made.                                                                                                                                                                            |                                                                                                                                                                                                                                                                                  |
| Khan, 2016) [69]<br>Khan, 2017) [70]    | No                                    | Academic performance                                    | Female: 45.7%<br>Male: 54.3% | IA:<br>Normal: 83.2%<br>Moderate: 16.1%<br>Severe: 0.6% | Acknowledged in Introduction of both papers.<br><br>No mention of it in the Discussion.                                                                                                                      | IA correlated negatively with:<br><ul style="list-style-type: none"> <li>• academic performance.</li> <li>• physical activity</li> </ul>                                                                                                                                         |
| Komleh, 2015 [71]                       | No                                    | academic achievement (GPA)                              | Female: 58%<br>Male: 42%     | IA<br>15.2% had IA (taken as > 44 on the scale).        | No mention in Introduction.<br><br>No measure of activities, although the discussion does note the impact on critical thinking and lower failure rate, but still does not reinterpret the “addiction” rates. | IA correlated with :<br><ul style="list-style-type: none"> <li>• time spent on the Internet</li> </ul><br>IA inversely correlated with<br><ul style="list-style-type: none"> <li>• failure of credits (higher IA, fewer failures).</li> </ul><br>No correlation with gender, GPA |
| Kootesh, 2016 [10]                      | No, and indicates that it is in DSM-5 | Pittsburgh Sleep Quality Inventory (PSQI) Mental Health | Female: 52%<br>Male: 48%     | IA Mean: (37.17±13.40)                                  | No mention in the Introduction or Discussion.                                                                                                                                                                | IA negative correlated with:<br><ul style="list-style-type: none"> <li>• sleep quality</li> <li>• mental health</li> </ul>                                                                                                                                                       |

| Lead Author, Publication Date, Citation | Validity of IA question ed? | Measured against (e.g. Depression) | Age & Gender                                           | Addiction rates (Prevalence)                          | Mentioned value of Internet for Academic work                                                                                                                                           | Results                                                                                                                                                                                                                                                                                                                                  |
|-----------------------------------------|-----------------------------|------------------------------------|--------------------------------------------------------|-------------------------------------------------------|-----------------------------------------------------------------------------------------------------------------------------------------------------------------------------------------|------------------------------------------------------------------------------------------------------------------------------------------------------------------------------------------------------------------------------------------------------------------------------------------------------------------------------------------|
|                                         |                             | Checklist (MHC)                    |                                                        |                                                       |                                                                                                                                                                                         |                                                                                                                                                                                                                                                                                                                                          |
| Kumar, 2017 [72]                        | No                          | None                               | Mean age: 20.67±1.08<br>Female/Male : 50/50            | IA<br>No addiction: 60%<br>Mild: 30%<br>Moderate: 10% | Acknowledged in Introduction.<br><br>No mention of work in the Discussion, so the 61% using it for study purposes ignored.                                                              | Internet used for: <ul style="list-style-type: none"> <li>entertainment: 62.7%</li> <li>study: 61.3%</li> <li>keeping in touch with friends and family: 61.3%</li> </ul> IA correlated with: <ul style="list-style-type: none"> <li>gender (M&gt;F)</li> <li>hours of internet usage per day</li> <li>expenditure on Internet</li> </ul> |
| Kundu, 2017 [73]                        | No                          | Becks depression scale             | Mean age: 20.15±1.89<br>Female: 75.38%<br>Male: 24.62% | IA:<br>None: 17.6%<br>Mild: 59.23%<br>Severe: 23.08%  | Introduction: Mentions use of internet by health professionals for work, but not about students for studying.<br><br>Makes no reference to the high academic percentage in the results. | Internet used for: <ul style="list-style-type: none"> <li>social media: 73.08%</li> <li>downloading media files: 65.38%</li> <li>academic purposes: 63.08%</li> <li>shopping: 51.54%</li> </ul> IA correlated with: <ul style="list-style-type: none"> <li>gender (M&gt;F)</li> </ul>                                                    |

| Lead Author, Publication Date, Citation | Validity of IA question ed? | Measured against (e.g. Depression | Age & Gender                                           | Addiction rates (Prevalence)                                       | Mentioned value of Internet for Academic work                                                                                                                                                                                                                      | Results                                                                                                                                                                                      |
|-----------------------------------------|-----------------------------|-----------------------------------|--------------------------------------------------------|--------------------------------------------------------------------|--------------------------------------------------------------------------------------------------------------------------------------------------------------------------------------------------------------------------------------------------------------------|----------------------------------------------------------------------------------------------------------------------------------------------------------------------------------------------|
|                                         |                             |                                   |                                                        |                                                                    |                                                                                                                                                                                                                                                                    | IA negatively correlated with:<br>• depression                                                                                                                                               |
| Latt, 2017 [74]                         | No                          | Islamic principles                | Female: 64.1%<br>Male: 35.9%                           | IA:<br>Normal: 5.8%,<br>48.5% mild,<br>44.7 moderate,<br>1% severe | Acknowledged in the Introduction.<br><br>Some of the academic-related benefits of the Internet are explored in the Discussion, but does not impact on interpretation of the addiction rates. However, it gives a more balanced view than most of the other papers. |                                                                                                                                                                                              |
| Liu, 2009 [75]                          | No                          | Academic performance              | Female: 48.9% <sup>a</sup><br>Male: 51.1% <sup>a</sup> | Prevalence of IAD:<br>Female: 11.6%<br>Male: 20.6%                 | Acknowledged in Introduction<br><br>The high proportion of work-related activity is noted in the Discussion, and appears to moderate their authors fears of addiction.                                                                                             | “Frequent” use of Internet:<br>• email: 51.4%<br>• searching for information: 34.4%<br>• chatting: 29.3%<br>• news: 25.0%<br>• entertainment news: 24.1%<br>• music: 23.0%<br>• films: 20.7% |

| Lead Author, Publication Date, Citation | Validity of IA question ed?        | Measured against (e.g. Depression               | Age & Gender                                                      | Addiction rates (Prevalence)                                                                                          | Mentioned value of Internet for Academic work                                                  | Results                                                                                                                                                                                                                                                                                                     |
|-----------------------------------------|------------------------------------|-------------------------------------------------|-------------------------------------------------------------------|-----------------------------------------------------------------------------------------------------------------------|------------------------------------------------------------------------------------------------|-------------------------------------------------------------------------------------------------------------------------------------------------------------------------------------------------------------------------------------------------------------------------------------------------------------|
|                                         |                                    |                                                 |                                                                   |                                                                                                                       |                                                                                                | <p>IA correlated with:</p> <ul style="list-style-type: none"> <li>• gender (M&gt;F)</li> </ul> <p>IA negatively correlated with:</p> <ul style="list-style-type: none"> <li>• academic performance.</li> </ul>                                                                                              |
| Loredo e Silva, 2018 [76]               | No                                 | Biggs' Study Process Question naire (R-SPQ-2F): | Mean age: 22.11±3.11<br>Female: 55.4%<br>Male: 44.6% <sup>a</sup> | IA Mean score: 46.27 (SD:12.12);<br>Non-problematic: 31.8%<br>Problematic: 68.2% (Frequent= 64.6%; significant= 3.6%) | No. Mentions educational value of smartphones, but not Internet (it might be implied)          | <p>Had medical apps: 67.8% (of the clerkship students, this rose to 93.4%)<br/>Use phone apps for learning: some 30-50% of the students.</p> <p>IA correlated with:</p> <ul style="list-style-type: none"> <li>• surface learning approaches</li> <li>• lower scores in deep learning approaches</li> </ul> |
| Madhusudan, 2018 [77]                   | No, but mentions that it is not in | None                                            | Mean age: 21.66±1.59<br>Female: 65.6%<br>Male: 34.4%              | IA:<br>None: 5.5%<br>Mild: 60.8%<br>Moderate: 31.3%<br>Severe: 2.5%                                                   | <p>Acknowledged in the Introduction.</p> <p>No mention of the 20% used "to gain knowledge"</p> | <p>Internet used for:</p> <ul style="list-style-type: none"> <li>• social networking: 55.93%</li> <li>• communication: 21.81%</li> <li>• <i>gain knowledge</i>: 20.58%</li> <li>• others: 1.63%</li> </ul>                                                                                                  |

| Lead Author, Publication Date, Citation | Validity of IA question ed? | Measured against (e.g. Depression                                                           | Age & Gender                                        | Addiction rates (Prevalence)               | Mentioned value of Internet for Academic work                                                              | Results                                                                                                                                                                                                                                                                                                   |
|-----------------------------------------|-----------------------------|---------------------------------------------------------------------------------------------|-----------------------------------------------------|--------------------------------------------|------------------------------------------------------------------------------------------------------------|-----------------------------------------------------------------------------------------------------------------------------------------------------------------------------------------------------------------------------------------------------------------------------------------------------------|
|                                         | the DSM.                    |                                                                                             |                                                     |                                            | and any modification of addiction. Also, the Communication is ill-defined, and may be work-related or not. | <p>IA correlated with:</p> <ul style="list-style-type: none"> <li>• gender (M&gt;F)</li> <li>• phase of degree (Final&gt;others)</li> <li>• place of origin (urban&gt;rural)</li> </ul> <p>IA negatively correlated with:</p> <ul style="list-style-type: none"> <li>• previous marks obtained</li> </ul> |
| Mallya, 2019 [78]                       | No                          | Depression, anxiety, and stress scale 21; Heart rate and BP components such as systolic and | Age: 19.56 <sup>a</sup><br>Female: 61%<br>Male: 39% | IA rate: 44%<br>(Female: 52%<br>Male: 31%) | Acknowledged in the Introduction.<br><br>No mention of work in the Discussion.                             | <p>Internet used mainly for:</p> <ul style="list-style-type: none"> <li>• social media: 85%</li> <li>• gaming: 10%</li> <li>• academic: 4%</li> <li>• shopping: 2%</li> </ul> <p>IA correlated with:</p> <ul style="list-style-type: none"> <li>• stress</li> <li>• depression</li> </ul>                 |



| Lead Author, Publication Date, Citation | Validity of IA question ed? | Measured against (e.g. Depression) | Age & Gender                                                    | Addiction rates (Prevalence)                                        | Mentioned value of Internet for Academic work                                                                    | Results                                                                                                                                                                                                                                                                                                                                                                                                                        |
|-----------------------------------------|-----------------------------|------------------------------------|-----------------------------------------------------------------|---------------------------------------------------------------------|------------------------------------------------------------------------------------------------------------------|--------------------------------------------------------------------------------------------------------------------------------------------------------------------------------------------------------------------------------------------------------------------------------------------------------------------------------------------------------------------------------------------------------------------------------|
|                                         |                             | diastolic BP                       |                                                                 |                                                                     |                                                                                                                  |                                                                                                                                                                                                                                                                                                                                                                                                                                |
| Malviya, 2014 [79]                      | No                          | None                               | Age range: 21-25.<br>Female: 32.2%<br>Male: 67.8%               | IA: None: 7.4%<br>Average: 64.5%<br>Moderate: 18.6%<br>Severe: 9.5% | No mention of work in the Introduction, or anywhere else in the paper.                                           | No correlation with gender.                                                                                                                                                                                                                                                                                                                                                                                                    |
| Mohammadbeigi, 2016 [80]                | No                          | Self-Rated Health                  | Mean age: 21.7±2.9<br>Female: 84.3%<br>Male: 15.7% <sup>a</sup> | 28.7% were addicted; mean score: 35.22±12.1.                        | Yes, in the Introduction. The high percentage usage for work-related activities is not raised in the Discussion. | 64.2% use it for “scientific search” and 37.0% use it for “Academic research”.<br><br>IA correlated with:<br><ul style="list-style-type: none"> <li>• Gender (F&gt;M)</li> <li>• Entertainment</li> <li>• Chat rooms</li> <li>• Have email</li> <li>• Use of Internet</li> </ul><br>IA negatively correlated with:<br><ul style="list-style-type: none"> <li>• Self-reported Health</li> <li>• academic performance</li> </ul> |
| Mostafa, 2019 [81]                      | No                          | None                               | Mean age: 21.78±1.48<br>Female: 74.0%                           | IA: Mild: 63.69%<br>Moderate: 35.43%<br>Severe: 1.18%               | Discussed in some detail in the Introduction.                                                                    | Internet used for:<br><ul style="list-style-type: none"> <li>• social networking: 86.61%</li> <li>• education: 66.53%</li> </ul>                                                                                                                                                                                                                                                                                               |

| Lead Author, Publication Date, Citation | Validity of IA question ed? | Measur ed against (e.g. Depression                                          | Age & Gender                                                    | Addiction rates (Prevalence)                                                                                                             | Mentioned value of Internet for Academic work                                                                        | Results                                                                                                                                                                                                                                                           |
|-----------------------------------------|-----------------------------|-----------------------------------------------------------------------------|-----------------------------------------------------------------|------------------------------------------------------------------------------------------------------------------------------------------|----------------------------------------------------------------------------------------------------------------------|-------------------------------------------------------------------------------------------------------------------------------------------------------------------------------------------------------------------------------------------------------------------|
|                                         |                             |                                                                             | Male: 26.0%                                                     |                                                                                                                                          | Mention of it in the Discussion but no interpretation impact on the Results                                          | <ul style="list-style-type: none"> <li>• entertainment: 61.81%</li> <li>• e-mail communication: 21.25%</li> <li>• <i>research</i>: 9.05%</li> <li>• net meeting: 5.51%</li> <li>• others: 1.57%</li> </ul>                                                        |
| Mukherjee, 2020 [82]                    | No                          | Insomni a Severity Index; Rosenberg Self Esteem Scale (RSES)                | Mean age: 20.0 <sup>a</sup><br><br>Female: 48.7%<br>Male: 51.3% | Average IA score: 51.76 ± 16.96<br><br>IA: “Average” (20-39): 30.0%<br>“over-users” (40-69): 50.7%<br>“internet addicts” (70-100): 19.3% | Acknowledged in the Introduction.<br><br>No mention of work in the paper.                                            | IA correlated with: <ul style="list-style-type: none"> <li>• gender (M&gt;F)</li> </ul> IA correlated negatively with: <ul style="list-style-type: none"> <li>• self-esteem</li> </ul>                                                                            |
| Nagori, 2016 [83]                       | No                          | Beck’s Anxiety Inventor y (BAI); World health organiza tion quality of life | Female: 53.33%<br>Male: 46.67%                                  | IA: Less than average: 34.3%<br>Average: 56.4%<br>Moderate: 8.4%<br>Addict: 0.9%                                                         | Acknowledged in Introduction.<br><br>No mention of the high use of Internet for academic purposes in the Discussion. | Internet mainly used for: <ul style="list-style-type: none"> <li>• social networking: 81.5%</li> <li>• <i>education</i>: 81.3%</li> <li>• entertainment: 72.2%</li> </ul> IA correlated with: <ul style="list-style-type: none"> <li>• gender (M&gt;F)</li> </ul> |

| Lead Author, Publication Date, Citation | Validity of IA question ed?                                                             | Measur ed against (e.g. Depression | Age & Gender                                         | Addiction rates (Prevalence)                                                                 | Mentioned value of Internet for Academic work                                   | Results                                                                                                                                                                                                                                                                                                                                                                                                                                                                                                                                                                     |
|-----------------------------------------|-----------------------------------------------------------------------------------------|------------------------------------|------------------------------------------------------|----------------------------------------------------------------------------------------------|---------------------------------------------------------------------------------|-----------------------------------------------------------------------------------------------------------------------------------------------------------------------------------------------------------------------------------------------------------------------------------------------------------------------------------------------------------------------------------------------------------------------------------------------------------------------------------------------------------------------------------------------------------------------------|
|                                         |                                                                                         | assessment scale (WHOQ OL-BREF).   |                                                      |                                                                                              |                                                                                 |                                                                                                                                                                                                                                                                                                                                                                                                                                                                                                                                                                             |
| Nath, 2016 [84]                         | No, although notes that Goldber g introduced it as satire, and that it is not in DSM 5. | None                               | Mean age: 22.51±2.91<br>Female: 39.4%<br>Male: 60.6% | IA:<br>Less than average: 9.04%<br>Average: 44.15%<br>Possible addict: 46.28<br>Addict: 0.53 | Acknowledged in Introduction.<br><br>No mention of academic work in Discussion. | Internet used for: <ul style="list-style-type: none"> <li>• social networking: 81.5%</li> <li>• <i>education</i>: 81.3%</li> <li>• entertainment: 72.2%</li> <li>• social networking: 67.0%</li> <li>• academic content: 13.3%</li> <li>• downloadable media: 9.6%</li> <li>• social media: 8.5%</li> <li>• pornography: 1.6%.</li> </ul> IA correlated with: <ul style="list-style-type: none"> <li>• gender (M&gt;F)</li> <li>• preferred to always stay online</li> <li>• exposed to the Internet for 6 years or more</li> <li>• forming online relationships</li> </ul> |

| Lead Author, Publication Date, Citation | Validity of IA question ed?             | Measured against (e.g. Depression | Age & Gender                                                      | Addiction rates (Prevalence)                                                                    | Mentioned value of Internet for Academic work                                                                                                      | Results                                                                                                                                                                                                                                                         |
|-----------------------------------------|-----------------------------------------|-----------------------------------|-------------------------------------------------------------------|-------------------------------------------------------------------------------------------------|----------------------------------------------------------------------------------------------------------------------------------------------------|-----------------------------------------------------------------------------------------------------------------------------------------------------------------------------------------------------------------------------------------------------------------|
|                                         |                                         |                                   |                                                                   |                                                                                                 |                                                                                                                                                    | <ul style="list-style-type: none"> <li>• poor performance at college</li> <li>• feelings of anxiety and depression</li> </ul>                                                                                                                                   |
| Öztürk Kaygusuz, 2019 [85]              | No, although says it is not in the DSM. | None                              | Mean age: 20.47±1.88<br>Female: 52.6%<br>Male: 47.4% <sup>a</sup> | IAT Mean Score: 29.92±16.33<br><br>Not Addicts: 77.5%<br>Probable Addicts: 19.4%<br>Addicts: 3% | Not in introduction.<br><br>Results that show correlation to work noted in the Discussion, yet has no impact on the interpretation of the results. | IA correlated with: <ul style="list-style-type: none"> <li>• time on Internet</li> <li>• <i>internet use for information search</i></li> <li>• <i>course-training-research</i></li> <li>• video conversation</li> <li>• suffering from sleeplessness</li> </ul> |
| Patel, 2018 [86]                        | No                                      | None                              | Mean age: 19.4.<br>Female: 41.72%<br>Male: 58.28%                 | Possible Addicts: 74.82%<br>Severe: 16.55%<br>Mild: 8.63%                                       | In the Introduction, mentions that it is useful for “knowledge sharing”<br><br>Academic use results ignored in the Discussion                      | Academic purposes bundled with gaming, social media, so it not possible to extract.                                                                                                                                                                             |
| Patil, 2017 [87]                        | No                                      | None                              | Mean age: 20<br>Female: 43.65%<br>Male: 56.35%                    | IA: Average: 61.47%<br>Possible: 34.83%<br>Addicts: 3.68%                                       | Acknowledged in Introduction.<br><br>No mention in paper of use of Internet for academic work                                                      | IA correlated with: <ul style="list-style-type: none"> <li>• gender (M&gt;F)</li> </ul>                                                                                                                                                                         |

| Lead Author, Publication Date, Citation | Validity of IA question ed?                                               | Measured against (e.g. Depression          | Age & Gender                                                       | Addiction rates (Prevalence)                                                    | Mentioned value of Internet for Academic work                                                                            | Results                                                                                                                                                                                                                        |
|-----------------------------------------|---------------------------------------------------------------------------|--------------------------------------------|--------------------------------------------------------------------|---------------------------------------------------------------------------------|--------------------------------------------------------------------------------------------------------------------------|--------------------------------------------------------------------------------------------------------------------------------------------------------------------------------------------------------------------------------|
| Pramanik, 2012 [88]                     | No                                                                        | None                                       | Female: 50%<br>Male: 50%                                           | IA: Mild: 40%<br>Moderate: 41.53%<br>Severe: 3.05%<br>None: 15.42% <sup>a</sup> | Acknowledged in Introduction.<br><br>No measure of educational usage; no discussion of educational usage in the paper.   |                                                                                                                                                                                                                                |
| Qadir, 2018 [89]                        | No                                                                        | None                                       | Mean age: 22.02 <sup>a</sup><br>Females: 50%<br>Males: 50%         | IA: Normal: 53%<br>Problematic: 45%<br>Addict: 2%                               | No mention in the Introduction.<br><br>The fact that 20% used it mainly for study does not influence the interpretation. | Internet mainly used for: <ul style="list-style-type: none"> <li>• entertainment: 53%</li> <li>• study: 20%</li> <li>• information: 15%</li> <li>• communication: 9%</li> <li>• gaming: 2%</li> <li>• shopping: 1%</li> </ul>  |
| Radeef, 2018 [90]                       | No, although noted that it is not included in DSM-5. Compared to Internet | Depression Anxiety, Stress Scale (DASS-21) | Mean age: 22.87 years<br>Female: 30.6%<br>Male: 69.4% <sup>a</sup> | 22.8% were IA                                                                   | Acknowledged in the Introduction.<br><br>No further mention of educational work in their paper.                          | IA correlated with: <ul style="list-style-type: none"> <li>• depression</li> <li>• anxiety symptoms</li> </ul> IA negatively correlated with: <ul style="list-style-type: none"> <li>• social interaction (inverse)</li> </ul> |

| Lead Author, Publication Date, Citation | Validity of IA questioned?       | Measured against (e.g. Depression) | Age & Gender                                           | Addiction rates (Prevalence)                       | Mentioned value of Internet for Academic work                                                                                      | Results                                                                                                                                                                                                                                                                                                                                                                                                                                                                                                                                                         |
|-----------------------------------------|----------------------------------|------------------------------------|--------------------------------------------------------|----------------------------------------------------|------------------------------------------------------------------------------------------------------------------------------------|-----------------------------------------------------------------------------------------------------------------------------------------------------------------------------------------------------------------------------------------------------------------------------------------------------------------------------------------------------------------------------------------------------------------------------------------------------------------------------------------------------------------------------------------------------------------|
|                                         | gaming disorder                  |                                    |                                                        |                                                    |                                                                                                                                    |                                                                                                                                                                                                                                                                                                                                                                                                                                                                                                                                                                 |
| Rebello, 2017 [91]                      | No                               | None                               | Female: 42.6% <sup>a</sup><br>Male: 57.4% <sup>a</sup> | CUI prevalence: 11.21%                             | Acknowledged in Introduction.<br><br>Academic results referred to in Discussion, but no implications on the CUI of this discussed. | Internet used for: <ul style="list-style-type: none"> <li>• <i>Studies</i>: 96.1%</li> <li>• Get connected with people: 90.6%</li> </ul> Felt: <ul style="list-style-type: none"> <li>• Technology should be utilized: 96.1%</li> <li>• Usage can be restricted: 81.3%</li> <li>• Internet usage as distraction: 58.9%</li> <li>• Hinder academics: 47.2%</li> </ul> CUI correlated with: <ul style="list-style-type: none"> <li>• mobile usage duration</li> <li>• Internet usage duration</li> <li>• maximum usage time</li> <li>• gender (M&gt;F)</li> </ul> |
| Rustam, 2017 [92]                       | No, although mentions that it is | None                               | Age range: 18-25.<br>Female: 53%<br>Males: 47%         | IA:<br>Normal: 27%<br>Mild: 45.5%<br>Moderate: 27% | No mention in the Introduction.                                                                                                    | Only IA results reported.                                                                                                                                                                                                                                                                                                                                                                                                                                                                                                                                       |

| Lead Author, Publication Date, Citation | Validity of IA question ed? | Measured against (e.g. Depression | Age & Gender                                     | Addiction rates (Prevalence)                                         | Mentioned value of Internet for Academic work                                                                                           | Results                                                                                                                                                                                                                                                                                                                                                                                                                                                                                                                                                                                                                                     |
|-----------------------------------------|-----------------------------|-----------------------------------|--------------------------------------------------|----------------------------------------------------------------------|-----------------------------------------------------------------------------------------------------------------------------------------|---------------------------------------------------------------------------------------------------------------------------------------------------------------------------------------------------------------------------------------------------------------------------------------------------------------------------------------------------------------------------------------------------------------------------------------------------------------------------------------------------------------------------------------------------------------------------------------------------------------------------------------------|
|                                         | not in DSM.                 |                                   |                                                  | Severe: 0.5%                                                         | No mention of work or academics in the paper.                                                                                           |                                                                                                                                                                                                                                                                                                                                                                                                                                                                                                                                                                                                                                             |
| Sahraian, 2016 [93]                     | No                          | Personality (NEO-FFI)             | Mean age: 21.48±2.59<br>Female: 61%<br>Male: 39% | IA<br>Normal: 45.3%<br>Mild: 51.4%<br>Moderate: 2.9%<br>Severe: 0.4% | Yes, mention academic work on Internet.<br><br>Academic work, including the high percentage in these results, ignored in the Discussion | Internet used for: <ul style="list-style-type: none"> <li>• <i>scientific research</i>: 64.0%</li> <li>• social web: 63.3%</li> <li>• e-mail: 59%</li> <li>• non -scientific research: 57%</li> <li>• music: 53.2%</li> <li>• film: 41%</li> <li>• software: 41%</li> <li>• chat: 30.2%</li> <li>• news: 39.2%</li> <li>• gaming: 17.6%</li> </ul> IA correlated with: <ul style="list-style-type: none"> <li>• neuroticism</li> <li>• gender (M&gt;F)</li> <li>• live with family &gt; Residence</li> <li>• single &gt; married</li> </ul> IA negatively correlated with: <ul style="list-style-type: none"> <li>• extraversion</li> </ul> |

| Lead Author, Publication Date, Citation | Validity of IA question ed? | Measured against (e.g. Depression        | Age & Gender                                                                         | Addiction rates (Prevalence)                                           | Mentioned value of Internet for Academic work                                              | Results                                                                                                                                                                                                                                                                                                                                                                                                                                                                                                                    |
|-----------------------------------------|-----------------------------|------------------------------------------|--------------------------------------------------------------------------------------|------------------------------------------------------------------------|--------------------------------------------------------------------------------------------|----------------------------------------------------------------------------------------------------------------------------------------------------------------------------------------------------------------------------------------------------------------------------------------------------------------------------------------------------------------------------------------------------------------------------------------------------------------------------------------------------------------------------|
|                                         |                             |                                          |                                                                                      |                                                                        |                                                                                            | <ul style="list-style-type: none"> <li>• agreeableness</li> <li>• conscientiousness</li> </ul>                                                                                                                                                                                                                                                                                                                                                                                                                             |
| Saied, 2016) [94]                       | No                          | None                                     | Mean age: 22.08±1.15<br><br>Female: 56.56% <sup>a</sup><br>Male: 43.44% <sup>a</sup> | IA:<br>Average: 64.1%<br>Potentially addicted: 33.2%<br>Addicted: 2.7% | No. The high usage figure of the Internet for academic purposes ignored in the Discussion. | Internet used for <sup>a</sup> : <ul style="list-style-type: none"> <li>• Facebook: 92.0%</li> <li>• <i>information &amp; research: 80.0%</i></li> <li>• other social media: 77.0%</li> <li>• entertainment: 76.9%</li> <li>• <i>studying: 72.9%</i></li> </ul> Of those who used it for Facebook, 79.1% used it for educational purposes.<br><br>IA correlated negatively with: <ul style="list-style-type: none"> <li>• academic grades</li> </ul> Adverse effects: eye irritation, followed by headache, then back pain |
| Saini, 2016 [95]                        | No                          | Personal ity Traits Goldber g's Big-Five | Female: 36.6%<br>Male: 63.4%                                                         | Mean IA score: 33.94 (SD 13.592)<br>No other IA figures given.         | No mentioned in the Introduction.<br><br>No mention of work or academics in paper.         | IA correlated with: <ul style="list-style-type: none"> <li>• higher neuroticism</li> <li>• less extroversion</li> </ul>                                                                                                                                                                                                                                                                                                                                                                                                    |



| Lead Author, Publication Date, Citation | Validity of IA question ed? | Measured against (e.g. Depression) | Age & Gender                                         | Addiction rates (Prevalence)                          | Mentioned value of Internet for Academic work                                                                                                               | Results                                                                                                                                                                                                                                                                                                                                                                                                                                                                                                                                                                                           |
|-----------------------------------------|-----------------------------|------------------------------------|------------------------------------------------------|-------------------------------------------------------|-------------------------------------------------------------------------------------------------------------------------------------------------------------|---------------------------------------------------------------------------------------------------------------------------------------------------------------------------------------------------------------------------------------------------------------------------------------------------------------------------------------------------------------------------------------------------------------------------------------------------------------------------------------------------------------------------------------------------------------------------------------------------|
|                                         |                             | factor test                        |                                                      |                                                       |                                                                                                                                                             |                                                                                                                                                                                                                                                                                                                                                                                                                                                                                                                                                                                                   |
| Salehi, 2014 [96]                       | No                          | None                               | Mean age: 21.79±2.42<br>Female: 61.1%<br>Male: 38.9% | Not addicted: 92.7%<br>At risk: 2.1%<br>Addicted 5.2% | No mention in the Introduction.<br><br>Although scientific research result referred to in the Discussion this did not impact on the interpretation of data. | Internet used for <ul style="list-style-type: none"> <li>• email: 54%</li> <li>• <i>scientific research</i>: 39.9%</li> <li>• communicating with friends and family: 35%</li> <li>• download films and music: 33.7%</li> <li>• news: 25.1%</li> <li>• chatting: 6.3%</li> <li>• shopping: 5.7%</li> <li>• writing blogs: 5.7%</li> <li>• playing games: 2.9%</li> </ul><br>IA correlated with: <ul style="list-style-type: none"> <li>• Gender (M&gt;F)</li> <li>• Education stage</li> <li>• Time spent of Internet</li> <li>• Games</li> <li>• Communicating with friends and family</li> </ul> |
| Salek Ebrahimi, 2019 [97]               | No                          | General Self-efficacy,             | Mean age: 19.73±1.11                                 | IA Normal (<50): 82.9%                                | No mention of educational work in the paper.                                                                                                                | IA Correlations unclear and contradictory.                                                                                                                                                                                                                                                                                                                                                                                                                                                                                                                                                        |

| Lead Author, Publication Date, Citation | Validity of IA question ed?                                                                | Measured against (e.g. Depression                | Age & Gender                                         | Addiction rates (Prevalence)                                             | Mentioned value of Internet for Academic work                                                                                           | Results                                                                                                      |
|-----------------------------------------|--------------------------------------------------------------------------------------------|--------------------------------------------------|------------------------------------------------------|--------------------------------------------------------------------------|-----------------------------------------------------------------------------------------------------------------------------------------|--------------------------------------------------------------------------------------------------------------|
|                                         |                                                                                            | Difficulty in Emotion Regulation, and Resilience | Female: 47.9%<br>Male: 52.1%                         | At risk (50-79): 15.6%<br>Dependent (80-100): 2.1%                       |                                                                                                                                         |                                                                                                              |
| Samaha, 2019 [98]<br>Samaha, 2018 [99]  | No, although acknowledges that there is currently no “gold standard” tool for measurement. | Medical Student Stressor Questionnaire           | Mean age: 21.92±2.16<br>Female: 63.4%<br>Male: 36.6% | IA:<br>Normal: 25.2 %<br>Mild: 48.7 %<br>Moderate: 24.8%<br>Severe: 1.3% | No mention in the Introduction.<br>No mention in the paper.<br>One paper is data; the focus was on the internal consistency of the IAT. | IA negatively correlated with:<br>• income<br><br>No correlation on gender                                   |
| Şenol, 2019 [100]                       | No                                                                                         | Sagittal alignment (Cobb)                        | Age range: 18-22<br>Female: 67.3%<br>Male: 32.7%     | IA:<br>Not Addicted: 55.4%<br>“Mean addicted”: 39.3%<br>Addicted: 5.4%   | No, although it does mention quick access to “scientific resources” in general.                                                         | Internet used for<br>• “research, lessons, news, music, video and social nets”: “about 85%”<br>• games: 7.1% |

| Lead Author, Publication Date, Citation | Validity of IA question ed?                                                 | Measured against (e.g. Depression                                                | Age & Gender                                                         | Addiction rates (Prevalence)                                                     | Mentioned value of Internet for Academic work                                                                                                                                                                                      | Results                                                                                                                                                                                 |
|-----------------------------------------|-----------------------------------------------------------------------------|----------------------------------------------------------------------------------|----------------------------------------------------------------------|----------------------------------------------------------------------------------|------------------------------------------------------------------------------------------------------------------------------------------------------------------------------------------------------------------------------------|-----------------------------------------------------------------------------------------------------------------------------------------------------------------------------------------|
|                                         |                                                                             |                                                                                  |                                                                      |                                                                                  | Does take it into account a little, but still equates usage with addiction.                                                                                                                                                        | IA negatively correlated with:<br>• lumbar Cobb angle                                                                                                                                   |
| Shadzi, 2020 [101]                      | No                                                                          | Depression Anxiety Stress Scale (DASS-21); Pittsburgh Sleep Quality Index (PSQI) | Mean age: 22.4±2.18<br><br>Female: 50.3%<br>Male: 49/7% <sup>a</sup> | 38.6% had problematic internet use                                               | Not mentioned in Introduction or anywhere else in paper.                                                                                                                                                                           | Problematic internet use predicted poor sleep quality through indirect pathways by the mediation of mental health problems.                                                             |
| Shi, 2019 [102]                         | No (in the Discussion, the authors do note that no IA is the gold standard. | Big Five Inventory (BFI); ADHD Self-Report Scale-V1.1;                           | Mean age: 19.74±1.48<br>Female: 58.9%<br>Male: 41.1%                 | IA:<br>None: 55.3% <sup>a</sup><br>Mild: 35.5%<br>Moderate: 8.6%<br>Severe: 0.6% | No mention in paper of value to students.<br><br>Generally high usage levels seen in opposition to work: “They are self-disciplined, diligent and goal striving, so that they can have better control of Internet use, and refrain | IA correlated with:<br>• age group<br>• academic year<br>• hometowns<br>• neuroticism<br><br>IA negatively correlated with:<br>• extraversion<br>• agreeableness<br>• conscientiousness |

| Lead Author, Publication Date, Citation | Validity of IA question ed? | Measured against (e.g. Depression) | Age & Gender                                                                                    | Addiction rates (Prevalence)                                    | Mentioned value of Internet for Academic work                                                                        | Results                                                                                                                                                |
|-----------------------------------------|-----------------------------|------------------------------------|-------------------------------------------------------------------------------------------------|-----------------------------------------------------------------|----------------------------------------------------------------------------------------------------------------------|--------------------------------------------------------------------------------------------------------------------------------------------------------|
|                                         |                             |                                    |                                                                                                 |                                                                 | from becoming addicted to it [i.e. the Internet].”                                                                   | <ul style="list-style-type: none"> <li>openness</li> </ul>                                                                                             |
| Shinde, 2018 [103]                      | No                          | DASS 21 (Depression)               | Mean age cannot be calculated because of conflicting results.<br>Female: 43.33%<br>Male: 56.66% | IA:<br><30: 31.11%<br>30-49: 48.89%<br>50-79: 20%<br>80-100: 0% | Acknowledged in the Introduction.<br><br>No examination of academic or other work; no mention anywhere in the paper. | IA correlated with: <ul style="list-style-type: none"> <li>depression</li> </ul>                                                                       |
| Shoghli, 2018) [6]                      | No                          | General health questionnaire       | Mean age: 25.29±1.23<br>Female: 51.1%                                                           | IA<br>Regular users: 63.5%<br>High risk: 36.5%                  | Nothing about using the Internet for academic work.                                                                  | IA correlated with: <ul style="list-style-type: none"> <li>marital status (S&gt;M)</li> <li>maternal occupation</li> <li>maternal education</li> </ul> |

| Lead Author, Publication Date, Citation | Validity of IA questioned? | Measured against (e.g. Depression)                                                                  | Age & Gender                                                     | Addiction rates (Prevalence)                                        | Mentioned value of Internet for Academic work                                                | Results                                                                                                                                                                                                                                                                                                                                                                                                                                                                                                                                                           |
|-----------------------------------------|----------------------------|-----------------------------------------------------------------------------------------------------|------------------------------------------------------------------|---------------------------------------------------------------------|----------------------------------------------------------------------------------------------|-------------------------------------------------------------------------------------------------------------------------------------------------------------------------------------------------------------------------------------------------------------------------------------------------------------------------------------------------------------------------------------------------------------------------------------------------------------------------------------------------------------------------------------------------------------------|
|                                         |                            | (GHQ-28)                                                                                            | Male: 48.9%                                                      | Addict: 0%                                                          |                                                                                              | IA negatively correlated with: <ul style="list-style-type: none"> <li>• general health</li> </ul>                                                                                                                                                                                                                                                                                                                                                                                                                                                                 |
| Simcharoen, 2018 [104]                  | No                         | Loneliness, interpersonal problems<br>UCLA loneliness scale; Inventory of Interpersonal Problems-32 | Mean age: 20.88±1.8<br>Female: 56.8%<br>Male: 43.2% <sup>a</sup> | IA:<br>None: 63.3%<br>Mild: 30.9%<br>Moderate: 5.2%<br>Severe: 0.6% | Acknowledged in the Introduction.<br><br>No mention of academic work elsewhere in the paper. | Internet used for <ul style="list-style-type: none"> <li>• social networking: 4.52%</li> <li>• chatting 4.46%</li> <li>• YouTube 4.28%</li> <li>• searching for information (e.g. Google) 4.27%</li> <li>• movies/music 3.42%</li> <li>• downloading (movies/music etc.) 3.36%</li> <li>• reading e-learning 3.08%</li> <li>• emailing 2.65%</li> <li>• shopping/auction 2.09%</li> <li>• forum participation (Web board): 1.96%</li> <li>• gaming 1.92%</li> <li>• banking/business: 1.56%</li> <li>• blogging/diary: 1.22%</li> <li>• gambling 1.04%</li> </ul> |
| Singh, 2018 [105]                       | No (although)              | Epworth Sleepiness                                                                                  | Mean age: 21.9±4.6 years                                         | IA<br>Normal: 34.23%<br>Mild: 57.72%                                | No mention in the Introduction.                                                              | IA correlated with: <ul style="list-style-type: none"> <li>• excessive daytime sleepiness</li> </ul>                                                                                                                                                                                                                                                                                                                                                                                                                                                              |

| Lead Author, Publication Date, Citation | Validity of IA question ed?                                                                           | Measured against (e.g. Depression | Age & Gender                                                      | Addiction rates (Prevalence)                              | Mentioned value of Internet for Academic work                                                                                                                                                    | Results                                                                                                                                                                                                                                                                           |
|-----------------------------------------|-------------------------------------------------------------------------------------------------------|-----------------------------------|-------------------------------------------------------------------|-----------------------------------------------------------|--------------------------------------------------------------------------------------------------------------------------------------------------------------------------------------------------|-----------------------------------------------------------------------------------------------------------------------------------------------------------------------------------------------------------------------------------------------------------------------------------|
|                                         | acknowledges that it is not in DSM)                                                                   | ss Scale (ESS)                    | Females: 71.82%<br>Males: 28.18%                                  | Moderate: 7.38%<br>Severe: 0.67%                          | No mention of academic work in the paper.                                                                                                                                                        |                                                                                                                                                                                                                                                                                   |
| Singh, 2018 [106]                       | No, but does acknowledge that “Measurement of level of problematic internet use has been a challenge” | Problematic Internet behaviors.   | Mean age: 20.6±0.88<br>Female: 21.3% <sup>a</sup><br>Males: 78.7% | IA:<br>Average: 80.3%<br>Moderate: 19.7%<br>Severe: 0%    | No mention of work. But they state this: Find higher Internet usage in the classroom among those with higher IA scores, but do not consider the possibility that this usage may be work-related. | IA correlated with: <ul style="list-style-type: none"> <li>• use of email</li> <li>• social networking</li> <li>• blogging</li> <li>• forums</li> <li>• online leisure activities</li> <li>• surfing without purpose</li> <li>• online shopping</li> <li>• downloading</li> </ul> |
| Siraj, 2015 [107]                       | No                                                                                                    | cGPA                              | Female: 73%<br>Males: 27%                                         | Internet user > 6 hours were observed to have higher CGPA | Discussed in some detail in Introduction.<br><br>Quite a bit of discussion on the topic. Does not explicitly modify the interpretation of the                                                    | Internet used for: <ul style="list-style-type: none"> <li>• <i>course-related</i>: 84.1 %</li> <li>• entertainment: 76.1%</li> <li>• <i>assignment</i>: 71.6%</li> <li>• non-course related: 43.2%</li> <li>• chat: 38.1%</li> <li>• email: 35.8%</li> </ul>                      |

| Lead Author, Publication Date, Citation | Validity of IA question ed?                                                         | Measured against (e.g. Depression                | Age & Gender                                   | Addiction rates (Prevalence)                                                          | Mentioned value of Internet for Academic work                                         | Results                                                                                                                                                                                                                                                                          |
|-----------------------------------------|-------------------------------------------------------------------------------------|--------------------------------------------------|------------------------------------------------|---------------------------------------------------------------------------------------|---------------------------------------------------------------------------------------|----------------------------------------------------------------------------------------------------------------------------------------------------------------------------------------------------------------------------------------------------------------------------------|
|                                         |                                                                                     |                                                  |                                                |                                                                                       | addiction figures, but does somewhat put it into perspective.                         | <ul style="list-style-type: none"> <li>• music: 33.5%</li> <li>• play game: 11.4%</li> <li>• download game: 4.5%</li> <li>• create web page: 1.7%</li> </ul>                                                                                                                     |
| Srijampana, 2014 [108]                  | No, although does acknowledge that there is a debate about how best to classify it. | None                                             | Mean age: 19.9<br>Female: 57.2%<br>Male: 42.8% | Less than average: 23.2%<br>Average users: 64.4%<br>Possible: 11.8%,<br>Addicts: 0.4% | Acknowledged in Introduction.<br><br>Incomplete/contradictory data on academic usage. | Internet used for: <ul style="list-style-type: none"> <li>• social networking: 59.7%</li> <li>• downloading media files: 18.9%</li> <li>• online gaming: 12.3%</li> <li>• <i>academic purposes: 9.0%</i></li> </ul><br>Correlation only of social media sites with gender (M>F). |
| Subhaprada, 2017 [109]                  | No                                                                                  | Academic performance (self-reported, no details) | Females: 37.8%<br>Males: 62.2%                 | IA:<br>None: 23.16%<br>Mild: 52.63%<br>Moderate: 24.21%<br>Severe: 0%                 | Acknowledged in the Introduction, no mention in discussion                            | IA correlated with: <ul style="list-style-type: none"> <li>• gender (M&gt;F)</li> </ul><br>IA negatively correlated with: <ul style="list-style-type: none"> <li>• academic performance.</li> </ul>                                                                              |
| Suresh, 2018 [110]                      | Yes, on definitio                                                                   | Lyubomirsky                                      |                                                | IAT:<br>None: 12.6%                                                                   | Acknowledged in the Introduction.                                                     | Higher levels of internet addiction showed lower                                                                                                                                                                                                                                 |

| Lead Author, Publication Date, Citation | Validity of IA question ed?                 | Measured against (e.g. Depression       | Age & Gender                                              | Addiction rates (Prevalence)                                         | Mentioned value of Internet for Academic work                                                                                                                                           | Results                                                                                                                                                                                                                                                                                                                                                     |
|-----------------------------------------|---------------------------------------------|-----------------------------------------|-----------------------------------------------------------|----------------------------------------------------------------------|-----------------------------------------------------------------------------------------------------------------------------------------------------------------------------------------|-------------------------------------------------------------------------------------------------------------------------------------------------------------------------------------------------------------------------------------------------------------------------------------------------------------------------------------------------------------|
|                                         | n and whether it should be included in DSM. | and Lepper's Subjective Happiness Scale |                                                           | Mild: 58.2%<br>Moderate: 28%<br>Severe: 0.7% <sup>a</sup>            | No mention in Discussion, although the Conclusion does point out that the Internet is important for academic work. This, however, does not influence the interpretation of the results. | levels of subjective happiness                                                                                                                                                                                                                                                                                                                              |
| Sushma, 2018 [111]                      | No                                          | None                                    | Mean age: 20.6±1.97<br><br>Female: 37.29%<br>Male: 62.17% | IA:<br>None: 21.2%<br>Mild: 58.2%<br>Moderate: 19.5%<br>Severe: 0.8% | Not mentioned in Introduction<br><br>No mention in the Discussion.                                                                                                                      | Internet used for:<br><ul style="list-style-type: none"> <li>• social networking: 25%</li> <li>• media: 24.20%</li> <li>• <i>academics</i>: 15.3%</li> <li>• games: 10.2%</li> <li>• others: 25.4%</li> </ul><br>IA correlated with:<br><ul style="list-style-type: none"> <li>• gender (M&gt;F)</li> <li>• time spent on using internet per day</li> </ul> |
| Taha, 2019 [11]                         | No Incorrectly states that it is included   | None                                    | Females: 42.1% <sup>a</sup><br>Males: 57.9%               | IA:<br>Lower than average: 2.9%<br>Average: 26.8%                    | Not mentioned in Introduction.<br><br>In limitations, does acknowledge that "some                                                                                                       | IA correlated with:<br><ul style="list-style-type: none"> <li>• gender (F&gt;M)</li> <li>• year of study: 2nd year &gt; 1st and 3rd year</li> </ul>                                                                                                                                                                                                         |



| Lead Author, Publication Date, Citation | Validity of IA question ed?                                                  | Measur ed against (e.g. Depress ion                                                                                      | Age & Gender                                     | Addiction rates (Prevalence)            | Mentioned value of Internet for Academic work                                                                                                                              | Results                                                                                                                                                                                                      |
|-----------------------------------------|------------------------------------------------------------------------------|--------------------------------------------------------------------------------------------------------------------------|--------------------------------------------------|-----------------------------------------|----------------------------------------------------------------------------------------------------------------------------------------------------------------------------|--------------------------------------------------------------------------------------------------------------------------------------------------------------------------------------------------------------|
|                                         | in the DSM.                                                                  |                                                                                                                          |                                                  | Possible addict: 57.9%<br>Addict: 12.4% | of the students may have been using the Internet for work- or research-related purposes”, but this does not ever affect the interpretation of their results as “addiction” | <ul style="list-style-type: none"> <li>• neck pain</li> <li>• sleeplessness</li> </ul> <p>Problems also reported: headaches, backache, weight gain, neck pain and other psychological problems</p>           |
| Tan, 2019 [7]                           | No, acknowl edges that it is not in the DSM, but suggests that it should be. | UCLA Loneline ss Scale; Academi c Expectat ions Stress Inventor y; Multidi mension al Scale of Perceive d Social Support | Mean age: 21.01±1.09<br>Female: 70%<br>Male: 30% | IA: 31.9%                               | Not mentioned in the paper.                                                                                                                                                | <p>IA negatively correlated with:</p> <ul style="list-style-type: none"> <li>• social support from family</li> <li>• social support from friends</li> <li>• social support from significant other</li> </ul> |

| Lead Author, Publication Date, Citation | Validity of IA question ed? | Measured against (e.g. Depression | Age & Gender                 | Addiction rates (Prevalence)                                                                           | Mentioned value of Internet for Academic work                                                                                                  | Results                                                                                                                                                                                                                                                                                                                                                                                                                                    |
|-----------------------------------------|-----------------------------|-----------------------------------|------------------------------|--------------------------------------------------------------------------------------------------------|------------------------------------------------------------------------------------------------------------------------------------------------|--------------------------------------------------------------------------------------------------------------------------------------------------------------------------------------------------------------------------------------------------------------------------------------------------------------------------------------------------------------------------------------------------------------------------------------------|
| Tsimtsiou, 2014 [112]                   | No                          | None                              | Mean age: 21.1±3.5           | Mean IAT score: 31.2 (SD = 16.4)<br>Normal: 52.9 %<br>Mild: 31.4 %<br>Moderate: 15.7 %                 | No discussion of Internet for work purposes anywhere in the paper.                                                                             | Internet used for: <ul style="list-style-type: none"> <li>• gambling: 39.1%</li> <li>• gaming: 35.1%</li> <li>• adult entertainment: 35.1%</li> </ul> IA correlated with: <ul style="list-style-type: none"> <li>• gambling</li> <li>• pornographic sites</li> <li>• games</li> </ul>                                                                                                                                                      |
| Tsimtsiou, 2015 [113]                   | No                          | None                              | Mean age: 21.34 <sup>a</sup> | IA:<br>IA Mean score: 25.4 (SD=13.9)<br>Normal: 69.9%<br>Mild: 24.5%<br>Moderate: 5.4%<br>Severe: 0.2% | Not mentioned anywhere in the paper; even the fact that 76% of the students use the Internet for their education is ignored in the Discussion. | Internet used for: <sup>a</sup> <ul style="list-style-type: none"> <li>• Facebook: 80.15%</li> <li>• e-mail: 77.90%</li> <li>• <i>education</i>: 75.84%</li> </ul> IA correlated with: <ul style="list-style-type: none"> <li>• visits in Internet cafes</li> <li>• <i>at school</i></li> <li>• via mobile application</li> <li>• Facebook,</li> <li>• Twitter</li> <li>• online games</li> <li>• mean duration of Internet use</li> </ul> |

| Lead Author, Publication Date, Citation | Validity of IA question ed?                                | Measured against (e.g. Depression         | Age & Gender                                              | Addiction rates (Prevalence)                                                    | Mentioned value of Internet for Academic work                                                                                                                                                             | Results                                                                                                                                                                                                                             |
|-----------------------------------------|------------------------------------------------------------|-------------------------------------------|-----------------------------------------------------------|---------------------------------------------------------------------------------|-----------------------------------------------------------------------------------------------------------------------------------------------------------------------------------------------------------|-------------------------------------------------------------------------------------------------------------------------------------------------------------------------------------------------------------------------------------|
| Upadhayay, 2017 [114]                   | No                                                         | None                                      | Females: 50%<br>Males: 50%                                | IA: None: 79%<br>“Slightly Addicted”: 21%                                       | Not mentioned in Introduction.<br><br>Use of Internet for education acknowledged in the Discussion, although makes the point that none of those who said it was a priority falls into the Addicted group. | Highest priority to using the Internet:<br><ul style="list-style-type: none"> <li>• movies/songs: 18%</li> <li>• <i>educational and learning activities: 17%</i></li> <li>• communicating with friends and families: 14%</li> </ul> |
| V, 2017 [115]                           | No                                                         | Depression, anxiety and stress (DASS 42). | No age or gender data given.                              | IA <sup>a</sup> : None: 29.7%<br>Mild: 49.1%<br>Moderate: 19.1%<br>Severe: 2.0% | No mention made of work anywhere in the paper.                                                                                                                                                            | IA correlated with:<br><ul style="list-style-type: none"> <li>• anxiety levels</li> </ul>                                                                                                                                           |
| Vidyachathoth, 2013 [116]               | Does acknowledge that there was some debate prior to DSM-5 | Affect (PANAS )                           | Mean age: 18.49±0.71<br><br>Female: 62.2%<br>Males: 37.8% |                                                                                 | No mention in the Introduction.<br><br>Only leisure work studied, so no mention of work.                                                                                                                  | IA negatively correlated with:<br><ul style="list-style-type: none"> <li>• Affects score.</li> </ul>                                                                                                                                |

| Lead Author, Publication Date, Citation | Validity of IA question ed? | Measured against (e.g. Depression)                             | Age & Gender                                                  | Addiction rates (Prevalence)              | Mentioned value of Internet for Academic work                                                | Results                                                                                                                                                                                                                                                                                                                                                                                                                   |
|-----------------------------------------|-----------------------------|----------------------------------------------------------------|---------------------------------------------------------------|-------------------------------------------|----------------------------------------------------------------------------------------------|---------------------------------------------------------------------------------------------------------------------------------------------------------------------------------------------------------------------------------------------------------------------------------------------------------------------------------------------------------------------------------------------------------------------------|
| Wang, 2020 [117]                        | No                          | Pittsburgh Sleep Quality Index (PSQI); Self-Harm Questionnaire | Mean age: 18.8 <sup>a</sup><br>Female: 58.48%<br>Male: 41.52% | 28.2% reported having IA (IA score > 40). | Not mentioned in Introduction.<br><br>Use of the Internet for work ignored.                  | IA correlated with: <ul style="list-style-type: none"> <li>• gender (F&gt;M)</li> <li>• upper grade students</li> <li>• poor sleep quality</li> <li>• possibility of self-injury</li> </ul>                                                                                                                                                                                                                               |
| Yerpude, 2019 [118]                     | No                          | Mental health inventory                                        | Mean age: 19.32±1.64<br><br>Female: 58.33%<br>Male: 41.67%    | Prevalence: 23.48%                        | Acknowledged in the Introduction.<br><br>No mention of work-related activities in the paper. | Internet used for: <ul style="list-style-type: none"> <li>• social networking: 35.61%</li> <li>• <i>educational</i>: 25.76%</li> <li>• recreational: 21.21%</li> <li>• games: 17.42%</li> </ul> IA correlated with: <ul style="list-style-type: none"> <li>• gender (M&gt;F)</li> <li>• computer ownership</li> <li>• login status</li> <li>• mode of internet access</li> <li>• anxiety</li> <li>• depression</li> </ul> |

| Lead Author, Publication Date, Citation | Validity of IA question ed?                                                                                                                     | Measur ed against (e.g. Depress ion                                                                                                               | Age & Gender                                           | Addiction rates (Prevalence)                             | Mentioned value of Internet for Academic work                                                                                                                                                             | Results                                                                                                                                                                                                                                       |
|-----------------------------------------|-------------------------------------------------------------------------------------------------------------------------------------------------|---------------------------------------------------------------------------------------------------------------------------------------------------|--------------------------------------------------------|----------------------------------------------------------|-----------------------------------------------------------------------------------------------------------------------------------------------------------------------------------------------------------|-----------------------------------------------------------------------------------------------------------------------------------------------------------------------------------------------------------------------------------------------|
|                                         |                                                                                                                                                 |                                                                                                                                                   |                                                        |                                                          |                                                                                                                                                                                                           | <ul style="list-style-type: none"> <li>• loss of emotional/behavioral control</li> <li>• emotional ties</li> <li>• psychological distress</li> </ul>                                                                                          |
| Yücens, 2018 [119]                      | Yes; indicates that it is not in the DSM, and other indications that definition is difficult. Also, that IA may be some form of self-medication | Liebowitz Social Anxiety Scale (LSAS); Barratt Impulsivity Scale-11 (BIS-11) Rosenberg Self-Esteem Scale (RSES); Beck Depression Inventory (BDI); | Female: 57.4% <sup>a</sup><br>Male: 42.6% <sup>a</sup> | IA<br>None (<50): 73%<br>Moderate: 23.7%<br>Severe: 3.3% | <p>Acknowledged in Introduction</p> <p>Not mentioned anywhere in the paper.</p> <p>In spite of the caveats in the Introduction, this does not appear to affect the interpretation of addiction rates.</p> | <p>IA correlated with:</p> <ul style="list-style-type: none"> <li>• anxiety (including social anxiety)</li> <li>• depression</li> </ul> <p>IA negatively correlated with:</p> <ul style="list-style-type: none"> <li>• self-esteem</li> </ul> |

| <b>Lead Author,<br/>Publication<br/>Date,<br/>Citation</b> | <b>Validity<br/>of IA<br/>question<br/>ed?</b>                                                 | <b>Measur<br/>ed<br/>against<br/>(e.g.<br/>Depress<br/>ion</b> | <b>Age &amp;<br/>Gender</b> | <b>Addiction rates<br/>(Prevalence)</b> | <b>Mentioned value of<br/>Internet for Academic<br/>work</b> | <b>Results</b> |
|------------------------------------------------------------|------------------------------------------------------------------------------------------------|----------------------------------------------------------------|-----------------------------|-----------------------------------------|--------------------------------------------------------------|----------------|
|                                                            | against<br>other<br>problems<br>.<br>It may<br>resemble<br>ICD<br>more<br>than an<br>addiction | Beck<br>Anxiety<br>Inventor<br>y (BAI).                        |                             |                                         |                                                              |                |

<sup>a</sup> Not stated in the paper, but calculated based upon the other percentages and raw data.

<sup>b</sup> The authors did not use the standard classification; instead, they used None (<40), Possible (40-69), Addicted:>70
